# Supplementary material for: Understanding the role of embarrassment in gynaecological screening: a qualitative study from the ASPIRE cervical cancer screening project in Uganda
Source: PubMed Central journal article supplement — BMJ Open. 2014 Apr 11;4(4):e004783. doi: 10.1136/bmjopen-2014-004783 (PMC3987737; doi:10.1136/bmjopen-2014-004783), 2014-04-11
Supplement: bmjopen-2014-004783.draft_revisions.pdf [file bmjopen-2014-004783.draft_revisions.pdf]

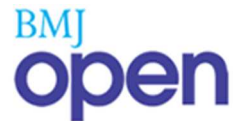

**Understanding the role of embarrassment in gynecologic screening: A qualitative study from the ASPIRE cervical cancer screening project in Uganda**

|                                 |                                                                                                                                                                                                                                                                                                                                                                                                                                                                                                                                                                                                                                                                                                                                          |
|---------------------------------|------------------------------------------------------------------------------------------------------------------------------------------------------------------------------------------------------------------------------------------------------------------------------------------------------------------------------------------------------------------------------------------------------------------------------------------------------------------------------------------------------------------------------------------------------------------------------------------------------------------------------------------------------------------------------------------------------------------------------------------|
| Journal:                        | <i>BMJ Open</i>                                                                                                                                                                                                                                                                                                                                                                                                                                                                                                                                                                                                                                                                                                                          |
| Manuscript ID:                  | bmjopen-2014-004783                                                                                                                                                                                                                                                                                                                                                                                                                                                                                                                                                                                                                                                                                                                      |
| Article Type:                   | Research                                                                                                                                                                                                                                                                                                                                                                                                                                                                                                                                                                                                                                                                                                                                 |
| Date Submitted by the Author:   | 01-Jan-2014                                                                                                                                                                                                                                                                                                                                                                                                                                                                                                                                                                                                                                                                                                                              |
| Complete List of Authors:       | Teng, Flora; University of British Columbia, Obstetrics and Gynecology<br>Mitchell, Sheona; University of British Columbia, Obstetrics and Gynecology; UHNBC, Obstetrics and Gynecology<br>Sekikubo, Musa; Makerere University/Mulago National Referral Hospital, Obstetrics and Gynecology<br>Biryabarema, Christine; Makerere University/Mulago National Referral Hospital, Obstetrics and Gynecology<br>Byamugisha, Josaphat; Makerere University/Mulago National Referral Hospital, Obstetrics and Gynecology<br>Steinberg, Malcolm; Simon Fraser University, Faculty of Health Sciences<br>Money, Deborah; University of British Columbia, Obstetrics and Gynecology<br>Ogilvie, Gina; British Columbia Center for Disease Control, |
| <b>Primary Subject Heading</b>: | Obstetrics and gynaecology                                                                                                                                                                                                                                                                                                                                                                                                                                                                                                                                                                                                                                                                                                               |
| Secondary Subject Heading:      | Reproductive medicine, Global health, Oncology                                                                                                                                                                                                                                                                                                                                                                                                                                                                                                                                                                                                                                                                                           |
| Keywords:                       | Gynaecological oncology < GYNAECOLOGY, Reproductive medicine < GYNAECOLOGY, PUBLIC HEALTH                                                                                                                                                                                                                                                                                                                                                                                                                                                                                                                                                                                                                                                |
|                                 |                                                                                                                                                                                                                                                                                                                                                                                                                                                                                                                                                                                                                                                                                                                                          |

SCHOLARONE™  
Manuscripts

**Title**

Understanding the role of embarrassment in gynecologic screening: A qualitative study from the ASPIRE cervical cancer screening project in Uganda

Flora F. Teng, MD MPH, Vancouver, BC, Canada<sup>1</sup>  
Sheona M. MITCHELL, MD, Vancouver, BC, Canada<sup>1</sup>  
Musa SEKIKUBO, MBChB, PhD(c), Kampala, Uganda<sup>4</sup>  
Christine BIRYABAREMA, MBChB, MSc, Kampala, Uganda<sup>4</sup>  
Josaphat K. BYAMUGISHA, MBChB, PhD, Kampala, Uganda<sup>4</sup>  
Malcolm STEINBERG MD, MSc, Vancouver, BC, Canada<sup>2,5</sup>  
Deborah M. MONEY, MD, Vancouver, BC, Canada<sup>1,3</sup>  
Gina S. OGILVIE, MD, MSc, DrPH, Vancouver, BC, Canada<sup>1,2</sup>

1. University of British Columbia, Department of Obstetrics and Gynecology
2. British Columbia Center for Disease Control
3. British Columbia's Women's Hospital, Women's Health Research Institute
4. Makerere University/Mulago National Referral Hospital Department of Obstetrics and Gynecology
5. Simon Fraser University, Faculty of Health Sciences

**Key Words:** Embarrassment, qualitative research, cervical cancer screening, HPV self-collection, community-based participatory research

**Reprint requests:**

Dr. Gina S. Ogilvie  
655 West 12th Avenue  
Vancouver, BC  
V5Z 4R4  
Email: gina.ogilvie@bccdc.ca

**Corresponding author:**

Dr. Gina S. Ogilvie  
655 West 12th Avenue  
Vancouver, BC  
V5Z 4R4  
Email: gina.ogilvie@bccdc.ca  
Tel. +1(604) 707-5608  
Fax +1(604) 707-5604

**Manuscript Word Count: 3992 (max 4000 words)**

## Abstract

**Objective:** To define embarrassment and develop an understanding of the role of embarrassment in relation to cervical cancer screening and self-collected HPV DNA testing in Uganda.

**Design:** Cross-sectional, qualitative study using semi-structured one-to-one interviews and focus groups.

**Participants:** Six key-informant health workers and 16 local women, purposively sampled. Key informant inclusion criteria: Ugandan members of the project team. Focus group inclusion criteria: Woman age 30-65 years, Luganda or Swahili speaking, living or working in the target Ugandan community. Exclusion criteria: unwillingness to sign informed consent.

**Setting:** Primary and tertiary low-resource setting in Kampala, Uganda

**Results:** In Luganda, embarrassment relating to cervical cancer is described in two forms. 'Community embarrassment' describes discomfort based upon how a person may be perceived by others. 'Personal embarrassment' relates to shyness or discomfort with her own genitalia. Community embarrassment was described in themes relating to place of study recruitment, amount of privacy in dwellings, personal relationship with health worker, handling of the vaginal swab, and misunderstanding of HPV self-collection as HIV testing. Themes of personal embarrassment related to lack knowledge, age, and novelty of the self-collection swab. Overall, embarrassment was a barrier to screening at the outset and diminished over time through education and knowledge. Fatalism regarding cervical cancer diagnosis, worry about results, and stigma associated with a cervical cancer diagnosis were other psychosocial barriers described. Overcoming psychosocial barriers to screening can include peer-to-peer education, drama, and media campaigns.

**Conclusions:** Embarrassment and other psychosocial barriers may play a large role at the onset of a screening program, but over time as education and knowledge increase, and the social norms around screening evolve, its role diminishes. The role of peer-to-peer education and community authorities on health care cannot be overlooked and can have a major impact in overcoming psychosocial and social barriers to screening.

**Abstract word count:** 298 (Max 300 words)

**Strengths and limitations of this study**

|                                                                                                                                                                                                                                                                                                                                                                 |
|-----------------------------------------------------------------------------------------------------------------------------------------------------------------------------------------------------------------------------------------------------------------------------------------------------------------------------------------------------------------|
| Strengths                                                                                                                                                                                                                                                                                                                                                       |
| <ul style="list-style-type: none"><li>○ This study is unique in the qualitative evaluation of the specific role of embarrassment in cervical cancer screening in Uganda.</li><li>○ The study also provides a novel comparison between a group of women who have had previous education on cervical cancer screening compared with those who have not.</li></ul> |
| Limitations                                                                                                                                                                                                                                                                                                                                                     |
| <ul style="list-style-type: none"><li>○ The research team was limited in its ability to explore the perspective of all ethnic groups in the target community.</li><li>○ The focus group format may have been prohibitive for the most embarrassed women to participate.</li></ul>                                                                               |

## Introduction

Approximately 233,700 women die in the developing world per year from cervical cancer which is largely preventable through screening and treatable in the early stages (1). In Uganda, 80% of cervical cancer is diagnosed at stage III or IV (2) largely due to a lack of screening infrastructure. With HPV emerging as a more sensitive screening test for cervical cancer, there are opportunities for Low and Middle Income countries (LMIC) to employ this technology to prevent cervical cancer morbidity and mortality (3). Screening programs in the developed world have made strides in increasing screening uptake (4) and recent advances such as high-risk Human Papillomavirus (hrHPV) DNA testing have improved screening among the most difficult-to-reach women (5–7). The HPV vaccine is currently being offered for primary prevention in young women but the benefits will not be realized for many years to come.

Screening remains the best option for prevention and yet in LMIC, and Uganda specifically, cytologic (Papanicolaou smear) screening programs are cost-prohibitive, resource-intensive, and not widely available (8). These barriers to screening, in addition to barriers of misinformation, access, psychosocial burden, and lack of reliable treatment options make screening uptake highly challenging. If the new technologies of hrHPV DNA testing or HPV vaccination are to have any impact, a better understanding, and renewed focus on understanding a woman's motivation for screening is essential.

A significant cervical cancer screening barrier cited by women in both the developing and developed world is embarrassment (9–15). Embarrassment in gynaecologic screening is a well-known, but ill-defined phenomenon. From screening for sexually transmitted infections to cervical cancer, many women cite embarrassment as reason for not participating in screening (4,6,7,9–12,14–24) yet little is known about the specific components of screening that are most embarrassing and the wider impact this has on screening uptake and adherence. Some studies discuss lack of privacy, discomfort with sexuality, fear of judgement, and religious rationale as contributors to embarrassment (7,9,16,25). Embarrassment is commonly viewed as a static psychosocial barrier with little discussion on how it can evolve and dissipate. With such strong psychosocial barriers to screening, it follows that compliance with future testing or initiating screening at all, may be threatened.

## Context and Setting

1  
2  
3 The ASPIRE (Advances in Screening and Prevention in Reproductive Cancers -  
4 <http://www.aspireafrica.ca/>) project was created to fill the gap in early detection  
5 and treatment of cervical cancer in Uganda. To date, this collaboration has  
6 conducted a baseline survey to explore the acceptability of self-collected HPV  
7 DNA testing and attitudes towards cervical cancer screening (26,27). As well as,  
8 a feasibility study enrolling 200 women and taking them from HPV swab self-  
9 collection to colposcopy and treatment (28).  
10  
11

12  
13 The key results from the initial phase of the ASPIRE assessment of 300 women  
14 in a low-resource community in Uganda showed that embarrassment was cited  
15 as significant barrier to self-collection (26). Of those unwilling to collect a swab,  
16 36% reported they would be embarrassed to collect a swab at home. In contrast,  
17 of those willing to collect a swab, 2% reported that they would be embarrassed to  
18 do so. Embarrassment to collect the swab at home was a significant negative  
19 predictor for participation (AOR 0.09 95% CI: 0.03-0.29) (26).  
20  
21

22 The objectives of this study are to define embarrassment in Uganda and develop  
23 an understanding of the role of embarrassment in relation to cervical cancer  
24 screening and self-collected HPV DNA testing. In addition, the aim is to  
25 determine viable solutions to overcoming barriers to embarrassment specifically  
26 and to cervical cancer screening overall. This study was designed to better  
27 understand embarrassment as a barrier to screening with the hope of informing  
28 the development of a prospective study investigating community-based HPV self-  
29 collection.  
30  
31

### 32 33 Methods

34 We conducted key stakeholder interviews with the Ugandan ASPIRE research  
35 team which included members of the Department of Obstetrics and Gynecology  
36 at the local tertiary hospital, Nurses from the local health unit, and community  
37 health workers in the target community. This method was used to obtain an initial  
38 framework to understand embarrassment in Uganda. We subsequently  
39 conducted three community focus groups to further develop these ideas. The  
40 community focus group discussion guide was developed using peer-reviewed  
41 research articles on key barriers and facilitators to cervical cancer screening  
42 (9,20,29–32) and discussion points generated within the ASPIRE key  
43 stakeholder interviews (Box 1). This methodology was used to incorporate local  
44 knowledge and cultural practice with current peer-reviewed knowledge. All  
45 participants signed informed consent and their confidentiality was ensured. This  
46 study received ethical approval from the local university in Uganda and the  
47 partner University in Canada.  
48  
49  
50  
51

### 52 Box 1. Focus Group Discussion Guide

| 53<br>54 <b>Items included in the focus group topic guide</b>                   |
|---------------------------------------------------------------------------------|
| 55 (1) Definition of embarrassment with regard to cervical cancer               |
| 56 (2) Implications of embarrassment on cervical cancer screening and treatment |
| 57<br>58<br>59<br>60                                                            |

|                                                                                                                                                                                                                                               |
|-----------------------------------------------------------------------------------------------------------------------------------------------------------------------------------------------------------------------------------------------|
| <p>(including HPV self-collection)</p> <p>(3) Overcoming embarrassment</p> <p>(4) Other barriers to cervical cancer screening</p> <p>(5) Perception of cervical cancer</p> <p>(6) Evaluation and future directions for the ASPIRE project</p> |
| <p><b>Items included in stakeholder consultation</b></p> <p>(1-6) of the focus group topic guide</p> <p>(7) Focus group methodology</p> <p>(8) Focus group data analysis</p>                                                                  |

A subset of key stakeholders participated in the focus groups to facilitate discussion. Local women were invited to participate through a purposive sampling lead by the ASPIRE community health workers (33). We recruited women between the ages of 30-69 who live or work within the target community in Uganda. Using the rich knowledge of the ASPIRE community health workers, we sought information rich participants who would be willing to share their views. We recruited a total of 16 women to attend 3 focus groups. The first focus group was comprised of 8 previous participants in the ASPIRE project. The second focus group was comprised of 8 women naïve to the ASPIRE project. The third focus group was conducted with all 16 women to review results, disseminate the findings, and seek clarification on any underdeveloped ideas. This recruitment strategy was specifically chosen to capture diverse perspectives from an experienced group and a naïve group. We hypothesized that the ASPIRE-experienced group would describe less embarrassment than the ASPIRE-Naive group. The community health workers involved in the project acted as focus group facilitators and the ASPIRE project coordinator (DB) assisted in translation and cultural interpretation of the results. Transcription and thematic analysis was undertaken following each focus group, with the goal of generating new ideas for discussion in subsequent groups. The topics were flexible and driven by the focus-group participants, in keeping with the foundation of qualitative research (34).

#### Data collection and Analysis

All stakeholder interviews and focus group discussions were audiotaped and transcribed by the primary researcher (FT) and Luganda translator (DB). Workshops were undertaken in Luganda and English. The English portion of the audiotape was transcribed. The Luganda translator reviewed the audiotape and written transcript to verify appropriate translation and content. During the second review, the translator also assisted as cultural liaison to ensure that the data correctly reflected the Ugandan cultural context. A thematic analysis was undertaken after the each focus group and the code structure was refined with each analysis.



A final thematic analysis was undertaken at the conclusion of the three workshops by FT and the data was presented to the participants at a final meeting to ensure that the content was correct and reflective of the intentions of the group (35). The coding structure was developed using grounded theory and content analysis (36). A second independent thematic analysis was undertaken by MS to enhance inter-rater reliability (37) and to ensure that all themes were internally convergent and externally divergent, meaning that categories were structured so that they were internally consistent, but distinct from one another. (38) Following the development of the code structure, a framework analysis was undertaken using the Health Belief Model (39). This framework has been utilized in understanding screening behaviours, preventative actions, illness behaviour and has been well-validated in these settings (20,21,39).

## Results

### *Demographics*

Of the 16 women that we surveyed, the average age was 44 years old with a range between 30 and 57. The majority of women were married (50%) and had attended primary school with or without some secondary education (75%). Eighty-eight percent worked outside and the home, lived in the target district in Kampala, within 30 minutes from the health centre (Table 1).

Table 1.

| <b>Demographic characteristics of focus group participants (n=16)*</b> |                                                  | <i>Number of Participants (%)</i> |
|------------------------------------------------------------------------|--------------------------------------------------|-----------------------------------|
| Characteristic                                                         |                                                  |                                   |
| Age groups                                                             |                                                  |                                   |
|                                                                        | 26-30                                            | 2 (13)                            |
|                                                                        | 31-35                                            | 4 (25)                            |
|                                                                        | 36-40                                            | 1 (6)                             |
|                                                                        | 41-45                                            | 1 (6)                             |
|                                                                        | 46-50                                            | 0 (0)                             |
|                                                                        | 51-55                                            | 5 (31)                            |
|                                                                        | 56-60                                            | 3 (19)                            |
| Marital Status                                                         |                                                  |                                   |
|                                                                        | Single                                           | 7 (44)                            |
|                                                                        | Married                                          | 8 (50)                            |
|                                                                        | Widowed                                          | 1 (6)                             |
| Education of the participant                                           |                                                  |                                   |
|                                                                        | No schooling or some primary schooling           | 1 (6)                             |
|                                                                        | Primary with or without some secondary schooling | 12 (75)                           |
|                                                                        | Secondary                                        | 1 (6)                             |
|                                                                        | Postsecondary                                    | 2 (13)                            |



|                                                                |                     |         |
|----------------------------------------------------------------|---------------------|---------|
| Work outside of home                                           |                     |         |
|                                                                | No                  | 2 (13)  |
|                                                                | Yes                 | 14 (88) |
| Live in Kisenyi                                                |                     |         |
|                                                                | No                  | 2 (13)  |
|                                                                | Yes                 | 14 (88) |
| Housing                                                        |                     |         |
|                                                                | Rent                | 10 (63) |
|                                                                | Own                 | 6 (38)  |
| Religion                                                       |                     |         |
|                                                                | 7th Day Adventist   | 1 (6)   |
|                                                                | Anglican/protestant | 4 (25)  |
|                                                                | Catholic            | 5 (31)  |
|                                                                | Muslim              | 6 (38)  |
| Time to walk to nearest health center, min                     |                     |         |
|                                                                | < 30                | 14 (88) |
|                                                                | 30 - 60             | 2 (13)  |
| * values for some variables do not sum to 100% due to rounding |                     |         |

### *Perceived Susceptibility*

Women perceived themselves to be at low risk for HPV infection, but the HIV screening model influenced perceptions for HPV screening. They could understand the need for HPV screening from their knowledge of the HIV paradigm. For some women, there was a belief that testing was only necessary for sexually active women. Similarly for cervical cancer, women perceived themselves to be at low risk and there was a lack of knowledge regarding the relationship between HPV and cervical cancer. In addition, most people do not seek care unless there are symptoms. One woman highlighted,

*“For Africans its hard to go to the hospital if you are not sick. You have to actually be sick in bed before you will go for treatment.”*

### *Perceived Severity*

Women acknowledged a sense of fatalism regarding cancer and felt that ‘knowing their status’ would be a situation too difficult to cope with. In addition, they didn’t want to worry about the outcome. They felt that worrying would make the disease worse. One woman described,

*“They don't want to know their [cervical cancer screening] status because if they know their status, they don't see any solution. They will just die, there is no treatment, there is nothing to be fixed. It is like a death sentence.”*

1  
2  
3 Surprisingly, some described that they would rather have HIV because there is a  
4 perception that there is an effective treatment, compared to a cancer diagnosis  
5 that has no cure.  
6

7  
8 *“Nowadays, people say that if someone to gets cancer, at least let her*  
9 *get HIV, than getting cancer, because for HIV there is treatment. but*  
10 *for cancer, there is no treatment.”*  
11

12  
13 There were also some women who felt that the testing and/or biopsy would  
14 actually cause cancer. Some women perceived that before they got a biopsy/test  
15 they were healthy and after the test, they were sick, so it must have been the test  
16 that made them sick. Women were also concerned about the overbearing cost of  
17 cancer treatment in LMIC. Alternatively, those women who had an awareness of  
18 HPV perceived that HPV could be treated and this diagnosis was less severe.  
19

### 20 21 *Barriers to cervical cancer screening*

22 Barriers to cervical cancer screening and HPV self-collection could easily be  
23 divided into barriers inherent to screening in general, barriers related to the use  
24 of the HPV swab, and overarching barriers related to the outcomes of the test  
25 (Table 2). Our focus group participants felt that cervical cancer screening in  
26 general was predicated upon trust in the researchers, adequate knowledge and  
27 an awareness of their risk of cervical cancer. One woman felt that a major  
28 barrier to screening was the worry that screening would incite, she described,  
29  
30

31  
32 *“What if I get my sample. What results will I get? That fear of getting*  
33 *the results, ... Am I positive? Am I negative? Really people fear to*  
34 *hear what [results] they will get, so they end up saying, I'd rather not*  
35 *test. I'd rather not collect, so that I may not know any results about*  
36 *what is happening to me.”*  
37

38  
39 The women had valuable insight into the barriers associated with HPV self-  
40 collection. Many women admitted to the initial novelty of the swab and discomfort  
41 with inserting items into the vagina as barriers. Women were also concerned of  
42 the swab causing infection or injury. For one group, there was significant  
43 discussion regarding hygiene and the cleanliness of vaginal discharge. Closely  
44 related to this was the associated embarrassment of having to give a swab of  
45 vaginal secretions (with a potential smell) to a health worker.  
46  
47

### 48 49 *Gender perspective*

50 Interestingly, barriers that were not endorsed included spousal permission and  
51 cultural beliefs, practices, and norms. When questioned, women were universally  
52 in support of screening whether they had spousal permission or not. One woman  
53 alluded to the mistrust and lack of communication within marriages as a source  
54 of HPV risk and as a result felt strongly about the importance of screening.  
55  
56  
57  
58  
59  
60

1  
2  
3  
4  
5  
6  
7  
8  
9  
10  
11  
12  
13  
14  
15  
16  
17  
18  
19  
20  
21  
22  
23  
24  
25  
26  
27  
28  
29  
30  
31  
32  
33  
34  
35  
36  
37  
38  
39  
40  
41  
42  
43  
44  
45  
46  
47  
48  
49  
50  
51  
52  
53  
54  
55  
56  
57  
58  
59  
60

*“You have to take care of your life. You can't say that my husband refused me to go for testing. It is not his life, its mine. You have to protect your life.”*

*“These men, they always go for treatment. Like an example for HIV. they test and they are positive. They start the treatment without telling their wives, so he keeps on going for treatment, when the wife doesn't know anything. So everyone is concerned about his or her life.”*

Women in Kisenyi also described cultural practices that normalized the insertion of items into the vagina. Not all women endorsed this activity, but some women reported inserting herbs to widen the birth canal during the later stages of pregnancy, which provided some women a comfort with their genitalia.

*“I don't think it has to do with shyness, because women they actually douche, they use herbs for all sorts of things. Even when they are pregnant, they use herbs, it is in most of cultures here, particularly in central Uganda, you use herbs to enlarge your birth canal to make sure you don't get an episiotomy.”*

1  
2  
3  
4  
5  
6  
7  
8  
9  
10  
11  
12  
13  
14  
15  
16  
17  
18  
19  
20  
21  
22  
23  
24  
25  
26  
27  
28  
29  
30  
31  
32  
33  
34  
35  
36  
37  
38  
39  
40  
41  
42  
43  
44  
45  
46  
47  
48  
49

Table 2. Health Belief Model Framework Analysis

| Health Belief Model Parameter | ASPIRE Respondents                                                                                                                                                               |                                                                                                                                                  |
|-------------------------------|----------------------------------------------------------------------------------------------------------------------------------------------------------------------------------|--------------------------------------------------------------------------------------------------------------------------------------------------|
|                               | HPV Self-Collection                                                                                                                                                              | Cervical Cancer                                                                                                                                  |
| Perceived Susceptibility      | Perceived risk is low<br>Testing will cause the disease<br>Screening is only necessary for sexually active women                                                                 |                                                                                                                                                  |
|                               | HIV education model increases risk awareness                                                                                                                                     | Limited knowledge of link between HPV and cervical cancer                                                                                        |
| Perceived Severity            | HPV can be treated                                                                                                                                                               | Cervical cancer is a death sentence<br>Cervical cancer treatment is expensive<br>No cure for cancer<br>Would rather get HIV than cervical cancer |
| Perceived Benefits            | Early detection<br>Treatment availability<br>Protecting yourself                                                                                                                 | Some treatment may be beneficial                                                                                                                 |
| Perceived Barriers            | Lack of time<br>Lack of knowledge<br>Mistrust of Researchers<br>Embarrassment<br>Worry about outcomes<br>Health-seeking behaviour only prompted by symptoms                      |                                                                                                                                                  |
|                               | Discomfort with inserting items into vagina<br>Concern with hygiene and/or vaginal discharge<br>Fear of pain or injury<br>Novelty of test                                        | Fatalism<br>Inability to cope with results<br>Stigma of having cancer                                                                            |
| Cues to Action                | Local Leaders / Community Health workers<br>Peer-to-Peer education and recruitment<br>Increasing knowledge<br>Screening necessary without symptoms<br>Fear of contracting cancer |                                                                                                                                                  |
| Self-efficacy                 | Spousal permission not required                                                                                                                                                  |                                                                                                                                                  |

### Embarrassment

There were many overlapping themes with barriers to screening and the associated embarrassment. Through our focus groups and key stakeholder discussions, there were two meaningful definitions of embarrassment. The first definition was ‘community embarrassment’ (‘kiswaaza’ in Luganda). It was described as the discomfort that one may feel depending on how they are perceived by others. The second can be described as ‘personal embarrassment’ (‘kikuswaaza’ in Luganda) or shyness/discomfort related to their own genitalia (Table 3).

Table 3.

#### Factors associated with embarrassment

| Community Embarrassment                      |
|----------------------------------------------|
| Confusion of HPV for HIV                     |
| Place of recruitment                         |
| Location of self-collection                  |
| Privacy                                      |
| Relationship with health worker              |
| Gender of the physician performing screening |
| Handling of the swab                         |
| Personal Embarrassment                       |
| Age of participant                           |
| Novelty of the test                          |
| lack of knowledge                            |

An important theme was the diminishment of embarrassment over time. In the group of women with previous involvement in the ASPIRE project, they described having embarrassment initially, but after multiple education meetings and actually performing self-collection, they didn’t feel embarrassed about screening. In fact, they noted that they would overcome their embarrassment if they knew they needed to for another reason. This was clearly described by this participant,

*“After knowing that you are HPV positive, then the fear goes away because you want to know what is going on, so you are free to go to the doctor to have the pelvic examination to see what is going on ... you need to know what next. See the doctor at that stage, no embarrassment.”*

The data demonstrates that embarrassment is not a static emotion. It is often quoted as an important barrier to screening, yet its not acknowledged as potentially the most modifiable barrier, compared to other factors such as age, socioeconomic status, and religion. This woman describes the modifiability of embarrassment,

1  
2  
3  
4  
5  
6  
7  
8  
9  
10  
11  
12  
13  
*“Embarrassment is not an issue concerning cervical cancer, Because HIV is very shameful compared to cancer. Nowadays people don't feel ashamed because of HIV because they are used to it. So even with cancer, people will get used to it and there will be no more embarrassment, it's not an issue. Through more training and seminars, people will get to know more, they will come to self-collection and everything will be okay.”*

#### 14 *Perceived Benefits and Cues to Action*

15 The women in both focus groups universally acknowledged that embarrassment  
16 would not be a major deterrent to screening if women had appropriate knowledge  
17 and education about the need for screening and if they had a private place to  
18 perform the self-collection. All women endorsed peer-to-peer education and  
19 engaging local leaders as some of the best strategies to recruit women and in  
20 fact, many women had already told their friends about the project and were eager  
21 to participate in the next phase of the ASPIRE project.  
22  
23

24  
25  
26  
27  
28  
29  
30  
31  
32  
*“Through these people who have self-collected and through more training, they also help those who have never attended the training, who have never self-collected, to make them be confident that self-collection is not painful. You do it yourself, it's not the doctor doing it. I think that through them, more people will come to do the self-collection.”*

33 Overall participants did not see large barriers to expanding the project, capacity  
34 building and resources, notwithstanding. The women were very positive that  
35 further recruitment and screening would not be a barrier. The history of the  
36 ASPIRE project since 2008 and the ongoing education initiatives have already  
37 'sensitized' women to the topic. Some women articulated their knowledge of the  
38 importance of screening and the ability to diagnose and treat the disease early.  
39 They had a variety of suggestions such as media messages, seminars and  
40 workshops, counselling sessions, incentives, as a means to improve uptake for  
41 screening.  
42  
43  
44  
45  
46

#### 47 Discussion

48 In the setting of a largely preventable condition and the availability of a vaccine, it  
49 is a great tragedy that cases of cervical cancer continue to rise and that more  
50 research is not being done on the science of implementation. Significant  
51 research is focused on screening sensitivity, specificity, vaccine targets and  
52 efficacy, but the most important of these factors is whether people will engage in  
53 screening and vaccination. This study is uniquely focused on implementation and  
54 engagement of the local women in a low-resource community in Uganda in a  
55  
56  
57  
58  
59  
60

1  
2  
3 novel screening program that has the potential to make cervical cancer screening  
4 widely available in the community where people live and work.  
5  
6

7 The medical literature provides a limited discussion of the psychosocial aspects  
8 of screening and these factors play a vital role in screening uptake and ongoing  
9 engagement with the patient. One study by Mutyaba and colleagues  
10 demonstrates that screening among medical professionals, who are charged with  
11 carrying out screening, is low (40). If even medical workers, who are meant to be  
12 the most informed are reluctant to partake in screening, then much work needs to  
13 be done to change the paradigm.  
14  
15

### 16 *Health Belief Model*

17 The Health Belief Model provides an important framework upon which to  
18 understand cervical cancer screening uptake and treatment. We found that  
19 women did not perceive themselves to be at great risk of cervical cancer, but that  
20 they perceived the diagnosis to be quite severe and fatal. They did not see the  
21 benefit of screening if results would only cause worry and a definitive treatment  
22 was not available. For those who had the knowledge that the disease could be  
23 caught early and treated, that was a significant cue to action to initiate screening.  
24 These findings are consistent with other studies exploring cervical cancer  
25 screening behaviour (8,20,21,29,41).  
26  
27  
28

### 29 *Embarrassment*

30 The women of Kisenyi defined embarrassment in two forms, community  
31 embarrassment and personal embarrassment, which are consistent with the  
32 literature. The first is closely related to a definition by the psychology literature  
33 which describes embarrassment as the uncomfortable, self-conscious, feeling a  
34 person has following the transgression of a social norm or rule (42). This is in-  
35 relation to a real, or perceived, other person. Personal embarrassment is closely  
36 related to, shame, which differs in that it is defined by a person's uncomfortable  
37 feeling with one's self (42).  
38  
39  
40

41 The majority of the research regarding embarrassment and health screening is in  
42 the colorectal screening literature. In this setting, Consedine and colleagues  
43 sought to further characterize embarrassment by focusing on the specific aspects  
44 of the colorectal screening encounter that engendered embarrassment. They  
45 were able to discern a distinct phenomenon called medical embarrassment which  
46 is specific to the medical encounter and is not indicative of trait embarrassment  
47 (43). Medical embarrassment was further subdivided by Consedine into bodily  
48 embarrassment and judgment concern. In his research, these two factors were  
49 shown to have significant impact in screening behaviour (25,43). Women in our  
50 study were concerned with handling of swab and the potential associated smell  
51 of the sample, which is closely related to bodily embarrassment. The women in  
52 our study also focused on judgement concern in their discomfort around  
53 perceptions of being tested for HIV, concerns for privacy, and the importance of  
54 location of self-collection and study recruitment.  
55  
56  
57  
58  
59  
60



1  
2  
3  
4  
5  
6  
7  
8  
9  
10  
11  
12  
13  
14  
15  
16  
17  
18  
19  
20  
21  
22  
23  
24  
25  
26  
27  
28  
29  
30  
31  
32  
33  
34  
35  
36  
37  
38  
39  
40  
41  
42  
43  
44  
45  
46  
47  
48  
49  
50  
51  
52  
53  
54  
55  
56  
57  
58  
59  
60

Another key finding from our study is the dynamic nature of embarrassment, and other psychosocial barriers, and the profound role that acknowledging and addressing psychosocial barriers can have in uptake of cervical cancer screening and treatment. Participants in our study noted that through the ASPIRE education seminars, their knowledge of early detection and treatment increased and their fear and embarrassment of screening diminished. After learning about the positive benefits of screening, they opted to screen, despite initial psychosocial barriers. White and colleagues conducted 6 focus groups and 10 in-depth of women attending VIA screening in a primary health care centre in Zambia. Women described similar worries and fears regarding the fatality of cervical cancer and the associated reluctance of screening (41). In this study, women were exposed to the education program in a local clinic in Zambia and their attitudes about screening changed as a result. This lends credence to our data and supports the importance of addressing psychosocial concerns. In fact, addressing psychosocial barriers may show greater benefit in a shorter amount of time, then attempts to address other known barriers such as socio-economic status, education level, access to services, or cost of services.

#### *Overcoming psychosocial barriers*

The participants of our study reiterated the power of local leaders and peer-to-peer education several times. In a culture that often relies on community authorities, such as *Sengas* (paternal aunties) for health information, rather than physicians, the role of these community members is vital (8). Women often discussed the role of their peers in encouraging them to come for screening and the important role that peers have in 'changing the social norm' regarding screening. What once seemed foreign and intimidating, may become familiar and approachable following the advice of a peer. This has been demonstrated among female and male sex workers in Africa in the setting of HIV/AIDS screening and treatment and has the great potential for cervical cancer screening and treatment (44).

Women also described the importance of changing the social norms around screening through media campaigns, drama groups, and overall increased awareness, similar to what has been done in the setting of HIV/AIDS. In the early stages of HIV/AIDS screening and treatment programs, the stigma and fatalism associated with an HIV/AIDS diagnosis was similar to what many women are currently reporting for cervical cancer. As antiretrovirals became more widely available, education improved, and the social norm changed around the topic, more women were willing to test. It is hoped that the same can be achieved with cervical cancer screening.

#### Strengths and Limitations

This study is the first of its kind to specifically address embarrassment, in depth, as a psychosocial barrier to gynecologic screening. The assessment was uniquely timed following a pilot study on HPV DNA self-collection in a

1  
2  
3 community-setting, so women could comment on cervical cancer screening in  
4 general and HPV DNA testing in particular. The opinions elicited in this study  
5 were also unique in incorporating those who had been exposed to previous  
6 educational screening for cervical cancer and those who had not, to provide a  
7 diversity of perspectives.  
8  
9

10  
11 This study was limited in its exploration of the multiple ethnic groups within the  
12 target community. We were able to access Luganda and Swahili speakers, but a  
13 significant Somali population exists in the community that were difficult to recruit  
14 due to language barriers. Furthermore, views of the most embarrassed women  
15 may not have been elicited given the focus group format. It may be that those  
16 women most embarrassed to discuss screening would be deterred by such a  
17 methodology. Unfortunately, an in-depth interview format, also may not reach  
18 these women.  
19

### 20 21 Conclusions and Policy Implications

22 This study demonstrates the important role of psychosocial barriers in cervical  
23 cancer screening and the factors that facilitate the modification of these barriers.  
24 The women in this study reported many of the same psychosocial barriers to  
25 screening (fear, anxiety, embarrassment, shame) as in other studies, yet they  
26 also noted that these diminished greatly with increasing knowledge and  
27 education. Participants overwhelmingly supported the role of peer-to-peer  
28 education in mitigating psychosocial barriers and facilitating screening uptake.  
29  
30

31  
32 The results in their final form will be presented back to the local community for  
33 knowledge dissemination and the data will also play a critical role in the  
34 development and design of a larger study exploring the clinical outcomes  
35 associated with community-based HPV self-collection versus Visual Inspection  
36 with Acetic Acid. In general, this data supports the integration of psychosocial  
37 outcomes at the onset of any screening program. In doing so, participants may  
38 experience less embarrassment and be more willing to engage in further  
39 screening and treatment activities.  
40  
41  
42  
43  
44  
45  
46  
47  
48  
49  
50  
51  
52  
53  
54  
55  
56  
57  
58  
59  
60

**Acknowledgements:**

Doreen Birungi, Veronica Najjuma, Harriet Nanyonga, Esther Namirimu who acted as project coordinators, community health workers, and cultural consultants on this project.

**Financial support:**

Women's Health Research Institute, Martha Piper Foundation (Grant # xxx), University of British Columbia's Branch of International Surgery. All study sponsors were not involved in the study design, collection, analysis, or decision to publish with the exception of the Women's Health Research Institute, which is chaired by Dr. Deborah M. Money, a co-author on this study.

**Contributorship Statement**

Flora Teng - primary author, present at all focus groups, completed transcription, thematic analysis of data and wrote majority of manuscript.  
Sheona Mitchell - secondary author, contributed to study design, analysis and structure of discussion, present at focus groups, edited manuscript.  
Musa Sekikubo - co-author, contributed to study design and secondary thematic analysis, edited manuscript.  
Christine Biryabarema - co-author, contributed to study design and guided focus group design.  
Josaphat Byamugisha - co-author, contributed to study design and format of analysis, edited manuscript.  
Malcolm Steinberg - co-author, advised extensively in initial study design.  
Deborah Money - co-author, advised in initial study design and edited manuscript.  
Gina Ogilvie - lead author, advised in initial study design, thematic analysis and contributed to final editing of the manuscript.

**Copyright:**

The Corresponding Author has the right to grant on behalf of all authors and does grant on behalf of all authors, an exclusive license on a worldwide basis to the BMJ Publishing Group Ltd, and its Licensees to permit this article (if accepted) to be published in BMJ Open and any other BMJ PGL products and to exploit all subsidiary rights, as set out in our license.

**Data Management and Sharing:** All authors had full access to the data of the study and accept full responsibility for the integrity of the data and the accuracy of the analysis. Thematic analysis and interview transcripts will be available from the corresponding author upon request.

**Competing Interests:**

None of the authors have a conflict of interest.

## References

1. Sankaranarayanan R, Ferlay J. Worldwide burden of gynaecological cancer: the size of the problem. *Best Pract. Res. Clin. Obstet. Gynaecol.* 2006 Apr 20(2):207–25.
2. Katahoire R, Kivunibi G, Murokora D, Arube Wani J, Siu G, Arinaitwe L. An Assessment of the Readiness for Introduction of the HPV Vaccine in Uganda. *Afr. J. Reprod. Health.* 6:159–72.
3. Ogilvie GS, Kraijden M, van Niekerk DJ, Martin RE, Ehlen TG, Ceballos K, et al. Primary cervical cancer screening with HPV testing compared with liquid-based cytology: results of round 1 of a randomised controlled trial -- the HPV FOCAL Study. *Br. J. Cancer.* Nature Publishing Group; 2012 Dec 4;107(12):1917–24.
4. Prevention A for CC. Improving Screening Coverage Rates of Cervical Cancer Prevention Programs: A Focus on Communities. *Cerv. Cancer Prev. Issues Depth, No. 4.* Seattle; 2004.
5. Ogilvie G, Kraijden M, Maginley J, Isaac-Renton J, Hislop G, Elwood-Martin R, et al. Feasibility of self-collection of specimens for human papillomavirus testing in hard-to-reach women. *CMAJ* 2007 Aug 28;177(5):480–3.
6. Dzuba, IG et. al. The Acceptability of Self-Collected Samples for HPV Testing vs. the Pap Test as Alternatives in Cervical Cancer Screening. *J. Womens. Health Gen. Based. Med.* 2002;11(3).
7. Quincy BL, Turbow DJ, Dabinett LN. Acceptability of self-collected human papillomavirus specimens as a primary screen for cervical cancer. *J. Obstet. Gynaecol. (Lahore).* 2012 Jan;32(1):87–91.
8. Mutyaba T, Fixelid E, Mirembe F, Weiderpass E. Influences on uptake of reproductive health services in Nsangi community of Uganda and their implications for cervical cancer screening. *Reprod. Health.* 2007 Jan;4:4.
9. Armstrong N, James V, Dixon-Woods M. The role of primary care professionals in women's experiences of cervical cancer screening: a qualitative study. *Fam. Pract.* 2011 Nov 16;1–5.
10. Mangoma JF, Chirenje MZ, Chimbari MJ, Chandiwana SK. An Assessment of Rural Women's Knowledge, Constraints and Perceptions on Cervical

- 1  
2  
3 Cancer Screening: The Case of Two Districts in Zimbabwe. *Afr. J. Reprod. Health.* 2006 Apr 1;10(1):91.  
4  
5  
6  
7 11. Matejic B, Vukovic D, Pekmezovic T, Kesic V, Markovic M. Determinants of  
8 preventive health behavior in relation to cervical cancer screening among  
9 the female population of Belgrade. *Health Educ. Res.* 2011 Apr;26(2):201–  
10 11.  
11  
12  
13 12. Abdullahi A, Copping J, Kessel A, Luck M, Bonell C. Cervical screening:  
14 Perceptions and barriers to uptake among Somali women in Camden.  
15 *Public Health.* Elsevier Ltd; 2009 Oct;123(10):680–5.  
16  
17  
18 13. Blomberg K, Ternestedt B, To S, Tishelman C. How do women who  
19 choose not to participate in population-based cervical cancer screening  
20 reason about their decision? *Psychooncology.* 2008;569(September  
21 2007):561–9.  
22  
23  
24 14. Orbell S. Pergamon COGNITION AND AFFECT AFTER CERVICAL  
25 SCREENING: THE ROLE OF PREVIOUS TEST OUTCOME AND  
26 PERSONAL OBLIGATION IN FUTURE UPTAKE EXPECTATIONS.  
27 *Science (80- ).* 1996;43(8):1237–43.  
28  
29  
30 15. Taylor VM, Jackson JC, Tu S-P, Yasui Y, Schwartz SM, Kuniyuki A, et al.  
31 Cervical cancer screening among Chinese Americans. *Cancer Detect.*  
32 *Prev.* 2002 May;26(2):139–45.  
33  
34  
35 16. Logan L, McIlpatrick S. Exploring women’s knowledge, experiences and  
36 perceptions of cervical cancer screening in an area of social deprivation.  
37 *Eur. J. Cancer Care (Engl).* 2011 Nov;20(6):720–7.  
38  
39  
40 17. Guilfoyle S, Franco R, Gorin SS. Exploring older women’s approaches to  
41 cervical cancer screening. *Health Care Women Int.* 2007;28(10):930–50.  
42  
43  
44 18. Cerigo H, Macdonald ME, Franco EL, Brassard P. Inuit women ’ s attitudes  
45 and experiences towards cervical cancer and prevention strategies in  
46 Nunavik , Quebec. *Int. J. Circumpolar Health.* 2011;70(x).  
47  
48  
49 19. Watkins MM, Gabali C, Winkleby M, Gaona E, Lebaron S. Barriers to  
50 cervical cancer screening in rural Mexico. *Int. J. Gynecol. Cancer.*  
51 2002;12(5):475–9.  
52  
53  
54 20. Johnson CE, Mues KE, Mayne SL, Kiblawi AN. Cervical Cancer Screening  
55 Among Immigrants and Ethnic Minorities: A Systematic Review Using the  
56 Health Belief Model. *J. Low. Genit. Tract Dis.* 2008;12(3):232–41.  
57  
58  
59  
60

- 1  
2  
3 21. Burak LJ, Msn MM. Health Care for Women International Using the health  
4 belief model to examine and predict college women ' s cervical cancer  
5 screening beliefs and behavior. (July 2012):251–62.  
6  
7
- 8 22. Von Wagner C, Good a, Whitaker KL, Wardle J. Psychosocial  
9 determinants of socioeconomic inequalities in cancer screening  
10 participation: a conceptual framework. *Epidemiol. Rev.* 2011 Jul [cited  
11 2012 Jul 13];33(1):135–47.  
12
- 13 23. Gatune JW, Nyamongo IK. An ethnographic study of cervical cancer  
14 among women in rural Kenya: is there a folk causal model? *Int. J. Gynecol.*  
15 *Cancer.* 2005;15(6):1049–59.  
16  
17
- 18 24. Richardson D, Maple K, Perry N, Ambler E, Jurd C, Fisher M. ORIGINAL  
19 RESEARCH ARTICLE A pilot qualitative analysis of the psychosocial  
20 factors which drive young people to decline chlamydia testing in the UK□:  
21 implications for health promotion and screening. 2010;187–90.  
22  
23
- 24 25. Consedine NS, Ladwig I, Reddig MK, Broadbent E a. The many faeces of  
25 colorectal cancer screening embarrassment: preliminary psychometric  
26 development and links to screening outcome. *Br. J. Health Psychol.* 2011  
27 Sep;16(3):559–79.  
28  
29
- 30 26. Mitchell S, Ogilvie G, Steinberg M, Sekikubo M, Biryabarema C, Money D.  
31 Assessing women's willingness to collect their own cervical samples for  
32 HPV testing as part of the ASPIRE cervical cancer screening project in  
33 Uganda. *Int. J. Gynaecol. Obstet. International Federation of Gynecology*  
34 *and Obstetrics;* 2011 Aug;114(2):111–5.  
35  
36
- 37 27. Mitchell SM, Sekikubo M, Biryabarema C, Byamugisha JJK, Steinberg M,  
38 Jeronimo J, et al. Factors associated with high-risk HPV positivity in a low-  
39 resource setting in sub-Saharan Africa. *Am. J. Obstet. Gynecol. Elsevier*  
40 *Inc;* 2013 Aug 30  
41  
42
- 43 28. Ogilvie GS, Mitchell S, Sekikubo M, Biryabarema C, Byamugisha J,  
44 Jeronimo J, et al. Results of a community-based cervical cancer screening  
45 pilot project using human papillomavirus self-sampling in Kampala,  
46 Uganda. *Int. J. Gynaecol. Obstet. [Internet]. International Federation of*  
47 *Gynecology and Obstetrics;* 2013 Aug;122(2):118–23.  
48  
49
- 50 29. Wood K, Jewkes R, Abrahams N. Cleaning the womb: constructions of  
51 cervical screening and womb cancer among rural black women in South  
52 Africa. *Soc. Sci. Med.* 1997 Jul;45(2):283–94.  
53  
54
- 55 30. Wellensiek N, Moodley M, Moodley J, Nkwanyana N. Knowledge of  
56 cervical cancer screening and use of cervical screening facilities among  
57  
58  
59  
60



- 1  
2  
3 women from various socioeconomic backgrounds in Durban, Kwazulu  
4 Natal, South Africa. *Int. J. Gynecol. Cancer*. 2002;12(4):376–82.  
5  
6  
7 31. Francis S a, Nelson J, Liverpool J, Soogun S, Mofammere N, Thorpe RJ.  
8 Examining attitudes and knowledge about HPV and cervical cancer risk  
9 among female clinic attendees in Johannesburg, South Africa. *Vaccine*.  
10 Elsevier Ltd; 2010 Nov;28(50):8026–32.  
11  
12 32. Sankaranarayanan R, Budukh a M, Rajkumar R. Effective screening  
13 programmes for cervical cancer in low- and middle-income developing  
14 countries. *Bull. World Health Organ*. 2001 Jan;79(10):954–62.  
15  
16  
17 33. Atkinson R, Flint J. Snowball Sampling. *Encycl. Soc. Sci. Res. Methods*  
18 [Internet]. Thousand Oaks, CA: SAGE; 2003. p. 1044–5.  
19  
20  
21 34. Ulin PR, Robinson ET, Tolley EE. *Qualitative Methods in Public Health: A*  
22 *Field Guide for Applied Research*. Jossey-Bass; 2005.  
23  
24  
25 35. Franzosi R. Content Analysis. *Encycl. Soc. Sci. Res. Methods*. Thousand  
26 Oaks, CA: SAGE; 2003. p. 187–91.  
27  
28  
29 36. Pope C, Ziebland S, Mays N. Analysing qualitative data. *Br. Med. J*.  
30 2000;320(January):5–7.  
31  
32 37. Mays N, Pope C. Assessing quality in qualitative research. *Br. Med. J*.  
33 2000;320(January).  
34  
35  
36 38. Lincoln YS, Guba EG. *Naturalistic Inquiry*. Beverly Hills: SAGE  
37 Publications; 1985.  
38  
39  
40 39. Janz NK, Champion VL, Strecher VJ. The Health Belief Model. In: Glanz K,  
41 Rimer BK, Lewis FM, editors. *Heal. Behav. Heal. Educ. Theory, Res. Pract.*  
42 3rd ed. San Francisco: Jossey-Bass; 2002. p. 45–66.  
43  
44  
45 40. Mutyaba T, Mmiro F a, Weiderpass E. Knowledge, attitudes and practices  
46 on cervical cancer screening among the medical workers of Mulago  
47 Hospital, Uganda. *BMC Med. Educ*. 2006 Jan [cited 2011 May 27];6:13.  
48  
49  
50 41. White HL, Mulambia C, Sinkala M, Mwanahamuntu MH, Parham GP,  
51 Moneyham L, et al. “Worse than HIV” or “not as serious as other  
52 diseases”? Conceptualization of cervical cancer among newly screened  
53 women in Zambia. *Soc. Sci. Med*. Elsevier Ltd; 2012 May;74(10):1486–93.  
54  
55  
56 42. Edelmann RJ. Embarrassment: The state of research. *Curr. Psychol. Rev*.  
57 [Internet]. 1981 May;1(2):125–37.  
58  
59  
60



- 1  
2  
3  
4  
5  
6  
7  
8  
9  
10  
11  
12  
13  
14  
15  
16  
17  
18  
19  
20  
21  
22  
23  
24  
25  
26  
27  
28  
29  
30  
31  
32  
33  
34  
35  
36  
37  
38  
39  
40  
41  
42  
43  
44  
45  
46  
47  
48  
49  
50  
51  
52  
53  
54  
55  
56  
57  
58  
59  
60
43. Consedine NS, Krivoshekova YS, Harris CR. Bodily embarrassment and judgment concern as separable factors in the measurement of medical embarrassment: psychometric development and links to treatment-seeking outcomes. *Br. J. Health Psychol.* 2007 Sep;12(Pt 3):439–62
44. Geibel S, King'ola N, Temmerman M, Luchters S. The impact of peer outreach on HIV knowledge and prevention behaviours of male sex workers in Mombasa, Kenya. *Sex. Transm. Infect.* 2012;88(5):357–62.

# BMJ Open

## Understanding the role of embarrassment in gynecologic screening: A qualitative study from the ASPIRE cervical cancer screening project in Uganda

|                                 |                                                                                                                                                                                                                                                                                                                                                                                                                                                                                                                                                                                                                                                                                                                                          |
|---------------------------------|------------------------------------------------------------------------------------------------------------------------------------------------------------------------------------------------------------------------------------------------------------------------------------------------------------------------------------------------------------------------------------------------------------------------------------------------------------------------------------------------------------------------------------------------------------------------------------------------------------------------------------------------------------------------------------------------------------------------------------------|
| Journal:                        | <i>BMJ Open</i>                                                                                                                                                                                                                                                                                                                                                                                                                                                                                                                                                                                                                                                                                                                          |
| Manuscript ID:                  | bmjopen-2014-004783.R1                                                                                                                                                                                                                                                                                                                                                                                                                                                                                                                                                                                                                                                                                                                   |
| Article Type:                   | Research                                                                                                                                                                                                                                                                                                                                                                                                                                                                                                                                                                                                                                                                                                                                 |
| Date Submitted by the Author:   | 12-Mar-2014                                                                                                                                                                                                                                                                                                                                                                                                                                                                                                                                                                                                                                                                                                                              |
| Complete List of Authors:       | Teng, Flora; University of British Columbia, Obstetrics and Gynecology<br>Mitchell, Sheona; University of British Columbia, Obstetrics and Gynecology; UHNBC, Obstetrics and Gynecology<br>Sekikubo, Musa; Makerere University/Mulago National Referral Hospital, Obstetrics and Gynecology<br>Biryabarema, Christine; Makerere University/Mulago National Referral Hospital, Obstetrics and Gynecology<br>Byamugisha, Josaphat; Makerere University/Mulago National Referral Hospital, Obstetrics and Gynecology<br>Steinberg, Malcolm; Simon Fraser University, Faculty of Health Sciences<br>Money, Deborah; University of British Columbia, Obstetrics and Gynecology<br>Ogilvie, Gina; British Columbia Center for Disease Control, |
| <b>Primary Subject Heading</b>: | Obstetrics and gynaecology                                                                                                                                                                                                                                                                                                                                                                                                                                                                                                                                                                                                                                                                                                               |
| Secondary Subject Heading:      | Reproductive medicine, Global health, Oncology                                                                                                                                                                                                                                                                                                                                                                                                                                                                                                                                                                                                                                                                                           |
| Keywords:                       | Gynaecological oncology < GYNAECOLOGY, Reproductive medicine < GYNAECOLOGY, PUBLIC HEALTH                                                                                                                                                                                                                                                                                                                                                                                                                                                                                                                                                                                                                                                |
|                                 |                                                                                                                                                                                                                                                                                                                                                                                                                                                                                                                                                                                                                                                                                                                                          |

SCHOLARONE™  
Manuscripts

**Title**

Understanding the role of embarrassment in gynecologic screening: A qualitative study from the ASPIRE cervical cancer screening project in Uganda

Flora F. Teng, MD, MPH, Vancouver, BC, Canada<sup>1</sup>  
Sheona M. MITCHELL, MD, MPH Vancouver, BC, Canada<sup>1</sup>  
Musa SEKIKUBO, MBChB, PhD(c), Kampala, Uganda<sup>4</sup>  
Christine BIRYABAREMA, MBChB, MSc, Kampala, Uganda<sup>4</sup>  
Josaphat K. BYAMUGISHA, MBChB, PhD, Kampala, Uganda<sup>4</sup>  
Malcolm STEINBERG MD, MSc, Vancouver, BC, Canada<sup>2,5</sup>  
Deborah M. MONEY, MD, Vancouver, BC, Canada<sup>1,3</sup>  
Gina S. OGILVIE, MD, MSc, DrPH, Vancouver, BC, Canada<sup>1,2</sup>

1. University of British Columbia, Department of Obstetrics and Gynecology
2. British Columbia Center for Disease Control
3. British Columbia's Women's Hospital, Women's Health Research Institute
4. Makerere University/Mulago National Referral Hospital Department of Obstetrics and Gynecology
5. Simon Fraser University, Faculty of Health Sciences

**Key Words:** Embarrassment, qualitative research, cervical cancer screening, HPV self-collection, community-based participatory research

**Reprint requests:**

Dr. Gina S. Ogilvie  
655 West 12th Avenue  
Vancouver, BC  
V5Z 4R4  
Email: gina.ogilvie@bccdc.ca

**Corresponding author:**

Dr. Gina S. Ogilvie  
655 West 12th Avenue  
Vancouver, BC  
V5Z 4R4  
Email: gina.ogilvie@bccdc.ca  
Tel. +1(604) 707-5608  
Fax +1(604) 707-5604

**Manuscript Word Count: 3992 (max 4000 words)**

## Abstract

**Objective:** To define embarrassment and develop an understanding of the role of embarrassment in relation to cervical cancer screening and self-collected HPV DNA testing in Uganda.

**Design:** Cross-sectional, qualitative study using semi-structured one-to-one interviews and focus groups.

**Participants:** Six key-informant health workers and 16 local women, purposively sampled. Key informant inclusion criteria: Ugandan members of the project team. Focus group inclusion criteria: Woman age 30-69 years, Luganda or Swahili speaking, living or working in the target Ugandan community. Exclusion criteria: unwillingness to sign informed consent.

**Setting:** Primary and tertiary low-resource setting in Kampala, Uganda

**Results:** In Luganda, embarrassment relating to cervical cancer is described in two forms. 'Community embarrassment' describes discomfort based upon how a person may be perceived by others. 'Personal embarrassment' relates to shyness or discomfort with her own genitalia. Community embarrassment was described in themes relating to place of study recruitment, amount of privacy in dwellings, personal relationship with health workers, handling of the vaginal swab, and misunderstanding of HPV self-collection as HIV testing. Themes of personal embarrassment related to lack knowledge, age, and novelty of the self-collection swab. Overall, embarrassment was a barrier to screening at the outset and diminished over time through education and knowledge. Fatalism regarding cervical cancer diagnosis, worry about results, and stigma associated with a cervical cancer diagnosis were other psychosocial barriers described. Overcoming psychosocial barriers to screening can include peer-to-peer education, drama, and media campaigns.

**Conclusions:** Embarrassment and other psychosocial barriers may play a large role at the onset of a screening program, but over time as education and knowledge increase, and the social norms around screening evolve, its role diminishes. The role of peer-to-peer education and community authorities on health care cannot be overlooked and can have a major impact in overcoming psychosocial and social barriers to screening.

**Abstract word count:** 298 (Max 300 words)

**Strengths and limitations of this study****Strengths**

- This study is unique in the qualitative evaluation of the specific role of embarrassment in cervical cancer screening in Uganda.
- The study also provides a novel comparison between a group of women who have had previous education on cervical cancer screening compared with those who have not.

**Limitations**

- The research team was limited in its ability to explore the perspective of all ethnic groups in the target community.
- The focus group format may have been prohibitive for the most embarrassed women to participate.

## Introduction

Approximately 233,700 women die in the developing world every year from cervical cancer which is largely preventable through screening and treatable in the early stages (1). In Uganda, 80% of cervical cancer is diagnosed at stage III or IV (2) largely due to a lack of screening infrastructure. With HPV emerging as a more sensitive screening test for cervical cancer, there are opportunities for Low and Middle Income countries (LMIC) to employ this technology to prevent cervical cancer morbidity and mortality (3). Screening programs in the developed world have made strides in increasing screening uptake (4) and recent advances such as high-risk Human Papillomavirus (hrHPV) DNA testing have improved screening among the most difficult-to-reach women (5–7). The HPV vaccine is currently being offered for primary prevention in young women but the benefits will not be realized for many years to come.

Screening remains the best option for prevention and yet in LMIC, and Uganda specifically, cytologic (Papanicolaou smear) screening programs are cost-prohibitive, resource-intensive, and not widely available (8). These barriers to screening, in addition to barriers of misinformation, access, psychosocial burden, and lack of reliable treatment options make screening uptake highly challenging. If the new technologies of hrHPV DNA testing or HPV vaccination are to have any impact, a better understanding, and renewed focus on understanding a woman's motivation for screening is essential.

A significant cervical cancer screening barrier cited by women in both the developing and developed world is embarrassment (9–15). Embarrassment in gynaecologic screening is a well-known, but ill-defined phenomenon. From screening for sexually transmitted infections to cervical cancer, many women cite embarrassment as reason for not participating in screening (4,6,7,9–12,14–24) yet little is known about the specific components of screening that are most embarrassing and the wider impact this has on screening uptake and adherence. Some studies discuss lack of privacy, discomfort with sexuality, fear of judgement, and religious rationale as contributors to embarrassment (7,9,16,25). Embarrassment is commonly viewed as a static psychosocial barrier with little discussion on how it can evolve and dissipate. With such strong psychosocial barriers to screening, it follows that compliance with future testing or initiating screening at all, may be threatened.

## Context and Setting

The ASPIRE (Advances in Screening and Prevention in Reproductive Cancers - <http://www.aspireafrica.ca/>) project was created to fill the gap in early detection and treatment of cervical cancer in Uganda. To date, this collaboration has conducted a baseline survey to explore the acceptability of self-collected HPV DNA testing and attitudes towards cervical cancer screening (26,27). As well as,

1  
2  
3 a feasibility study enrolling 200 women and taking them from HPV swab self-  
4 collection to colposcopy and treatment (28).  
5  
6

7 The key results from the initial phase of the ASPIRE assessment of 300 women  
8 in a low-resource community in Uganda showed that embarrassment was cited  
9 as significant barrier to self-collection (26). Of those unwilling to collect a swab,  
10 36% reported they would be embarrassed to collect a swab at home. In contrast,  
11 of those willing to collect a swab, 2% reported that they would be embarrassed to  
12 do so. Embarrassment to collect the swab at home was a significant negative  
13 predictor for participation (AOR 0.09 95% CI: 0.03-0.29) (26).  
14  
15

16 The objectives of this study are to define embarrassment in Uganda and develop  
17 an understanding of the role of embarrassment in relation to cervical cancer  
18 screening and self-collected HPV DNA testing. In addition, the aim is to  
19 determine viable solutions to overcoming barriers to embarrassment specifically  
20 and to cervical cancer screening overall. This study was designed to better  
21 understand embarrassment as a barrier to screening with the hope of informing  
22 the development of a prospective study investigating community-based HPV self-  
23 collection.  
24  
25

## 26 27 Methods

28 We conducted key stakeholder interviews with the Ugandan ASPIRE research  
29 team which included members of the Department of Obstetrics and Gynecology  
30 at the local tertiary hospital, nurses from the local health unit, and community  
31 health workers in the target community. This method was used to obtain an initial  
32 framework to understand embarrassment in Uganda. We subsequently  
33 conducted three community focus groups to further develop these ideas, the first  
34 two groups included 8 women in each and the third group involved all  
35 participants that attended the first two focus groups. The community focus group  
36 discussion guide was developed using peer-reviewed research articles on key  
37 barriers and facilitators to cervical cancer screening (9,20,29–32) and discussion  
38 points generated within the ASPIRE key stakeholder interviews (Box 1). This  
39 methodology was used to incorporate local knowledge and cultural practice with  
40 current peer-reviewed knowledge. All participants signed informed consent and  
41 their confidentiality was ensured. This study received ethical approval from the  
42 local university in Uganda and the partner University in Canada.  
43  
44  
45  
46

### 47 Box 1. Focus Group Discussion Guide

| 48<br>49<br>50       | <b>Items included in the focus group topic guide</b>                         |
|----------------------|------------------------------------------------------------------------------|
| 51                   | (1) Definition of embarrassment with regard to cervical cancer               |
| 52                   | (2) Implications of embarrassment on cervical cancer screening and treatment |
| 53                   | (including HPV self-collection)                                              |
| 54                   | (3) Overcoming embarrassment                                                 |
| 55                   | (4) Other barriers to cervical cancer screening                              |
| 56                   | (5) Perception of cervical cancer                                            |
| 57<br>58<br>59<br>60 |                                                                              |



(6) Evaluation and future directions for the ASPIRE project

|                                                   |
|---------------------------------------------------|
| <b>Items included in stakeholder consultation</b> |
| (1-6) of the focus group topic guide              |
| (7) Focus group methodology                       |
| (8) Focus group data analysis                     |

A subset of key stakeholders participated in the focus groups to facilitate discussion. Local women were invited to participate through a purposive sampling lead by the ASPIRE community health workers (33). We recruited women between the ages of 30-69 who live or work within the target community in Uganda. Using the rich knowledge of the ASPIRE community health workers, we sought information rich participants who would be willing to share their views. We recruited a total of 16 women to attend the focus groups. The first focus group was comprised of 8 previous participants in the ASPIRE project. The second focus group was comprised of 8 women naïve to the ASPIRE project. The third focus group was conducted with all 16 women to review results, disseminate the findings, and seek clarification on any underdeveloped ideas. This recruitment strategy was specifically chosen to capture diverse perspectives from an experienced group and a naïve group. We hypothesized that the ASPIRE-experienced group would describe less embarrassment than the ASPIRE-naïve group. The community health workers involved in the project acted as focus group facilitators and the ASPIRE project coordinator (DB) assisted in translation and cultural interpretation of the results. Transcription and thematic analysis was undertaken following each focus group, with the goal of generating new ideas for discussion in subsequent groups. The topics were flexible and driven by the focus-group participants, in keeping with the foundation of qualitative research (34).

#### Data collection and Analysis

All stakeholder interviews and focus group discussions were audiotaped and transcribed by the primary researcher (FT) and Luganda translator (DB). Workshops were undertaken in Luganda and English. The English portion of the audiotape was transcribed. The Luganda translator reviewed the audiotape and written transcript to verify appropriate translation and content. During the second review, the translator also assisted as cultural liaison to ensure that the data correctly reflected the Ugandan cultural context. A thematic analysis was undertaken after the each focus group and the code structure was refined with each analysis. The stakeholder interviews were analyzed and reported in the Results and were also used to inform content of the discussion guide used for subsequent focus groups.

A final thematic analysis was undertaken at the conclusion of the three workshops by FT and the data was presented to the participants at a final meeting to ensure that the content was correct and reflective of the intentions of

the group (35). The coding structure was developed using grounded theory and content analysis (36). A second independent thematic analysis was undertaken by MS to enhance inter-rater reliability (37) and to ensure that all themes were internally convergent and externally divergent, meaning that categories were structured so that they were internally consistent, but distinct from one another. (38) Following the development of the code structure, a framework analysis was undertaken using the Health Belief Model (39). This framework has been utilized in understanding screening behaviours, preventative actions, illness behaviour and has been well-validated in these settings (20,21,39).

## Results

### *Demographics*

Of the 16 women that we surveyed, the average age was 44 years old with a range between 30 and 57. The majority of women were married (50%) and had attended primary school with or without some secondary education (75%). Eighty-eight percent worked outside the home and lived in the target district in Kampala within 30 minutes from the health centre (Table 1).

Table 1.

| <b>Demographic characteristics of focus group participants (n=16)</b> |                                                  |                               |
|-----------------------------------------------------------------------|--------------------------------------------------|-------------------------------|
| Characteristic                                                        |                                                  | <i>Number of Participants</i> |
| Age groups                                                            |                                                  |                               |
|                                                                       | 26-30                                            | 2                             |
|                                                                       | 31-35                                            | 4                             |
|                                                                       | 36-40                                            | 1                             |
|                                                                       | 41-45                                            | 1                             |
|                                                                       | 46-50                                            | 0                             |
|                                                                       | 51-55                                            | 5                             |
|                                                                       | 56-60                                            | 3                             |
| Marital Status                                                        |                                                  |                               |
|                                                                       | Single                                           | 7                             |
|                                                                       | Married                                          | 8                             |
|                                                                       | Widowed                                          | 1                             |
| Education of the participant                                          |                                                  |                               |
|                                                                       | No schooling or some primary schooling           | 1                             |
|                                                                       | Primary with or without some secondary schooling | 12                            |
|                                                                       | Secondary                                        | 1                             |
|                                                                       | Postsecondary                                    | 2                             |
| Work outside of home                                                  |                                                  |                               |
|                                                                       | No                                               | 2                             |
|                                                                       | Yes                                              | 14                            |
| Live in                                                               |                                                  |                               |

|                                            |                     |    |
|--------------------------------------------|---------------------|----|
| Kisenyi                                    |                     |    |
|                                            | No                  | 2  |
|                                            | Yes                 | 14 |
| Housing                                    |                     |    |
|                                            | Rent                | 10 |
|                                            | Own                 | 6  |
| Religion                                   |                     |    |
|                                            | 7th Day Adventist   | 1  |
|                                            | Anglican/protestant | 4  |
|                                            | Catholic            | 5  |
|                                            | Muslim              | 6  |
| Time to walk to nearest health center, min |                     |    |
|                                            | < 30                | 14 |
|                                            | 30 - 60             | 2  |

### *Perceived Susceptibility*

Women perceived themselves to be at low risk for HPV infection, but the HIV screening model influenced perceptions for HPV screening. They could understand the need for HPV screening from their knowledge of the HIV paradigm. For some women, there was a belief that testing was only necessary for sexually active women. Similarly for cervical cancer, women perceived themselves to be at low risk and there was a lack of knowledge regarding the relationship between HPV and cervical cancer. In addition, most people do not seek care unless there are symptoms. One woman highlighted,

*“For Africans its hard to go to the hospital if you are not sick. You have to actually be sick in bed before you will go for treatment.” (Focus Group 1 – Previous ASPIRE Participant)*

### *Perceived Severity*

Women acknowledged a sense of fatalism regarding cancer and felt that ‘knowing their status’ would be a situation too difficult to cope with. In addition, they didn’t want to worry about the outcome. They felt that worrying would make the disease worse. One woman described,

*“They don’t want to know their [cervical cancer screening] status because if they know their status, they don’t see any solution. They will just die, there is no treatment, there is nothing to be fixed. It is like a death sentence.” (Key Stakeholder Interview)*

Surprisingly, some described that they would rather have HIV because there is a perception that there is an effective treatment, compared to a cancer diagnosis that has no cure.

1  
2  
3  
4  
5  
6  
7  
8  
9  
10  
11  
12  
13  
14  
15  
16  
17  
18  
19  
20  
21  
22  
23  
24  
25  
26  
27  
28  
29  
30  
31  
32  
33  
34  
35  
36  
37  
38  
39  
40  
41  
42  
43  
44  
45  
46  
47  
48  
49  
50  
51  
52  
53  
54  
55  
56  
57  
58  
59  
60

*“Nowadays, people say that if someone to gets cancer, at least let her get HIV, than getting cancer, because for HIV there is treatment, but for cancer, there is no treatment.” (Focus Group 2 – ASPIRE Naïve Participant)*

There were also some women who felt that the testing and/or biopsy would actually cause cancer. Some women perceived that before they got a biopsy/test they were healthy and after the test, they were sick, so it must have been the test that made them sick. Women were concerned about the overbearing cost of cancer treatment in LMIC. Alternatively, those women who had an awareness of HPV perceived that HPV could be treated and this diagnosis was less severe.

#### *Perceived Benefits and Cues to Action*

The women in both focus groups universally acknowledged that embarrassment would not be a major deterrent to screening if women had appropriate knowledge and education about the need for screening and if they had a private place to perform the self-collection. All women endorsed peer-to-peer education and engaging local leaders as some of the best strategies to recruit women and in fact, many women had already told their friends about the project and were eager to participate in the next phase of the ASPIRE project.

*“Through these people who have self-collected and through more training, they also help those who have never attended the training, who have never self-collected, to make them be confident that self-collection is not painful. You do it yourself, it’s not the doctor doing it. I think that through them, more people will come to do the self-collection.” (Focus Group 1 – ASPIRE Participant)*

Overall participants did not see large barriers to expanding the project, capacity building and resources, notwithstanding. The women were very positive that further recruitment and screening would not be a barrier. The history of the ASPIRE project since 2008 and the ongoing education initiatives have already ‘sensitized’ women to the topic. Some women articulated their knowledge of the importance of screening and the ability to diagnose and treat the disease early. They had a variety of suggestions such as media messages, seminars and workshops, counselling sessions, incentives, as a means to improve uptake for screening.

#### *Barriers to cervical cancer screening*

Barriers to cervical cancer screening and HPV self-collection could easily be divided into barriers inherent to screening in general, barriers related to the use of the HPV swab, and overarching barriers related to the outcomes of the test (Table 2). Our focus group participants felt that cervical cancer screening in general was predicated upon trust in the researchers, adequate knowledge and

1  
2  
3 an awareness of their risk of cervical cancer. One woman felt that a major  
4 barrier to screening was the worry that screening would incite, she described,  
5  
6

7 *“What if I get my sample. What results will I get? That fear of getting*  
8 *the results, ... Am I positive? Am I negative? Really people fear to*  
9 *hear what [results] they will get, so they end up saying, I'd rather not*  
10 *test. I'd rather not collect, so that I may not know any results about*  
11 *what is happening to me.” (Focus Group 1 – ASPIRE Participant)*  
12  
13

14 The women had valuable insight into the barriers associated with HPV self-  
15 collection. Many women admitted to the initial novelty of the swab and discomfort  
16 with inserting items into the vagina as barriers. Women were also concerned of  
17 the swab causing infection or injury. For one group, there was significant  
18 discussion regarding hygiene and the cleanliness of vaginal discharge. Closely  
19 related to this was the associated embarrassment of having to give a swab of  
20 vaginal secretions (with a potential smell) to a health worker.  
21  
22

### 23 *Gender perspective*

24 Interestingly, barriers that were not endorsed included spousal permission and  
25 cultural beliefs, practices, and norms. When questioned, women were universally  
26 in support of screening whether they had spousal permission or not. One woman  
27 alluded to the mistrust and lack of communication within marriages as a source  
28 of HPV risk and as a result felt strongly about the importance of screening.  
29  
30

31 *“You have to take care of your life. You can't say that my husband*  
32 *refused me to go for testing. It is not his life, its mine. You have to*  
33 *protect your life.” (Focus Group 2 – ASPIRE Naïve Participant)*  
34  
35

36 *“These men, they always go for treatment. Like an example for HIV.*  
37 *they test and they are positive. They start the treatment without telling*  
38 *their wives, so he keeps on going for treatment, when the wife doesn't*  
39 *know anything. So everyone is concerned about his or her life.” (Focus*  
40 *Group 2 – ASPIRE Naïve Participant)*  
41  
42

43 Women in Kisenyi also described cultural practices that normalized the insertion  
44 of items into the vagina. Not all women endorsed this activity, but some women  
45 reported inserting herbs to widen the birth canal during the later stages of  
46 pregnancy, which provided some women a comfort with their genitalia.  
47  
48

49 *“I don't think it has to do with shyness, because women they actually*  
50 *douche, they use herbs for all sorts of things. Even when they are*  
51 *pregnant, they use herbs, it is in most of cultures here, particularly in*  
52 *central Uganda, you use herbs to enlarge your birth canal to make*  
53 *sure you don't get an episiotomy.” (Key Stakeholder Interview)*  
54  
55  
56  
57  
58  
59  
60

1  
2  
3  
4  
5  
6  
7  
8  
9  
10  
11  
12  
13  
14  
15  
16  
17  
18  
19  
20  
21  
22  
23  
24  
25  
26  
27  
28  
29  
30  
31  
32  
33  
34  
35  
36  
37  
38  
39  
40  
41  
42  
43  
44  
45  
46  
47  
48  
49

Table 2. Health Belief Model Framework Analysis

| Health Belief Model Parameter | ASPIRE Respondents                                                                                                                                                               |                                                                                                                                                  |
|-------------------------------|----------------------------------------------------------------------------------------------------------------------------------------------------------------------------------|--------------------------------------------------------------------------------------------------------------------------------------------------|
|                               | HPV Self-Collection                                                                                                                                                              | Cervical Cancer                                                                                                                                  |
| Perceived Susceptibility      | Perceived risk is low<br>Testing will cause the disease<br>Screening is only necessary for sexually active women                                                                 |                                                                                                                                                  |
|                               | HIV education model increases risk awareness                                                                                                                                     | Limited knowledge of link between HPV and cervical cancer                                                                                        |
| Perceived Severity            | HPV can be treated                                                                                                                                                               | Cervical cancer is a death sentence<br>Cervical cancer treatment is expensive<br>No cure for cancer<br>Would rather get HIV than cervical cancer |
| Perceived Benefits            | Early detection<br>Treatment availability<br>Protecting yourself                                                                                                                 | Some treatment may be beneficial                                                                                                                 |
| Perceived Barriers            | Lack of time<br>Lack of knowledge<br>Mistrust of Researchers<br>Embarrassment<br>Worry about outcomes<br>Health-seeking behaviour only prompted by symptoms                      |                                                                                                                                                  |
|                               | Discomfort with inserting items into vagina<br>Concern with hygiene and/or vaginal discharge<br>Fear of pain or injury<br>Novelty of test                                        | Fatalism<br>Inability to cope with results<br>Stigma of having cancer                                                                            |
| Cues to Action                | Local Leaders / Community Health workers<br>Peer-to-Peer education and recruitment<br>Increasing knowledge<br>Screening necessary without symptoms<br>Fear of contracting cancer |                                                                                                                                                  |
| Self-efficacy                 | Gender Perspective - Spousal permission not required                                                                                                                             |                                                                                                                                                  |



### Embarrassment

There were many overlapping themes with barriers to screening and the associated embarrassment. Through our focus groups and key stakeholder discussions, there were two meaningful definitions of embarrassment. The first definition was ‘community embarrassment’ (‘kiswaaza’ in Luganda). It was described as the discomfort that one may feel depending on how they are perceived by others. The second can be described as ‘personal embarrassment’ (‘kikuswaaza’ in Luganda) or shyness/discomfort related to their own genitalia (Table 3).

Table 3.

#### Factors associated with embarrassment

| Community Embarrassment                      |
|----------------------------------------------|
| Confusion of HPV for HIV                     |
| Place of recruitment                         |
| Location of self-collection                  |
| Privacy                                      |
| Relationship with health worker              |
| Gender of the physician performing screening |
| Handling of the swab                         |
| Personal Embarrassment                       |
| Age of participant                           |
| Novelty of the test                          |
| lack of knowledge                            |

An important theme was the diminishment of embarrassment over time. In the group of women with previous involvement in the ASPIRE project, they described having embarrassment initially, but after multiple education meetings and actually performing self-collection, they didn’t feel embarrassed about screening. In fact, they noted that they would overcome their embarrassment if they knew they needed to for another reason. This was clearly described by this participant,

*“After knowing that you are HPV positive, then the fear goes away because you want to know what is going on, so you are free to go to the doctor to have the pelvic examination to see what is going on ... you need to know what next. See the doctor at that stage, no embarrassment.” (Focus Group 3 – Participant)*

The data demonstrates that embarrassment is not a static emotion. It is often quoted as an important barrier to screening, yet its not acknowledged as potentially the most modifiable barrier, compared to other factors such as age, socioeconomic status, and religion. This woman describes the modifiability of embarrassment,



1  
2  
3  
4  
5  
6  
7  
8  
9  
10  
11  
12  
13  
14  
15  
16  
17  
18  
19  
20  
21  
22  
23  
24  
25  
26  
27  
28  
29  
30  
31  
32  
33  
34  
35  
36  
37  
38  
39  
40  
41  
42  
43  
44  
45  
46  
47  
48  
49  
50  
51  
52  
53  
54  
55  
56  
57  
58  
59  
60

*“Embarrassment is not an issue concerning cervical cancer, Because HIV is very shameful compared to cancer. Nowadays people don't feel ashamed because of HIV because they are used to it. So even with cancer, people will get used to it and there will be no more embarrassment, it's not an issue. Through more training and seminars, people will get to know more, they will come to self-collection and everything will be okay.” (Focus Group 3 – Participant)*

## Discussion

In the setting of a largely preventable condition and the availability of a vaccine, it is a great tragedy that cases of cervical cancer continue to rise and that more research is not being done on the science of implementation. Significant research is focused on screening sensitivity, specificity, vaccine targets and efficacy, but the most important of these factors is whether people will engage in screening and vaccination. This study is uniquely focused on implementation and engagement of the local women in a low-resource community in Uganda in a novel screening program that has the potential to make cervical cancer screening widely available in the community where people live and work.

The medical literature provides a limited discussion of the psychosocial aspects of screening and these factors play a vital role in screening uptake and ongoing engagement with the patient. One study by Mutyaba and colleagues demonstrates that screening among medical professionals, who are charged with carrying out screening, is low (40). If even medical workers, who are meant to be the most informed are reluctant to partake in screening, then much work needs to be done to change the paradigm.

### *Health Belief Model*

The Health Belief Model provides an important framework upon which to understand cervical cancer screening uptake and treatment. Our study fits into the overall context of the Health Belief Model with a specific focus on embarrassment. We found that women did not perceive themselves to be at great risk of cervical cancer, but that they perceived the diagnosis to be quite severe and fatal. They did not see the benefit of screening if results would only cause worry and a definitive treatment was not available. For those who had the knowledge that the disease could be caught early and treated, that was a significant cue to action to initiate screening. These findings are consistent with other studies exploring cervical cancer screening behaviour (8,20,21,29,41).

### *Embarrassment*

Although several themes emerged, many of these have been described previously but by focusing on an analysis of embarrassment specifically we found that the women of Kisenyi defined embarrassment in two forms, community embarrassment and personal embarrassment,. The first is closely related to a

1  
2  
3 definition by the psychology literature which describes embarrassment as the  
4 uncomfortable, self-conscious, feeling a person has following the transgression  
5 of a social norm or rule (42). This is in-relation to a real, or perceived, other  
6 person. Personal embarrassment is closely related to shame, which differs in that  
7 it is defined by a person's uncomfortable feeling with one's self (42).  
8  
9

10 The majority of the research regarding embarrassment and health screening is in  
11 the colorectal screening literature. In this setting, Consedine and colleagues  
12 sought to further characterize embarrassment by focusing on the specific aspects  
13 of the colorectal screening encounter that engendered embarrassment. They  
14 were able to discern a distinct phenomenon called medical embarrassment which  
15 is specific to the medical encounter and is not indicative of trait embarrassment  
16 (43). Medical embarrassment was further subdivided by Consedine into bodily  
17 embarrassment and judgment concern. In his research, these two factors were  
18 shown to have significant impact in screening behaviour (25,43). Women in our  
19 study were concerned with handling of swab and the potential associated smell  
20 of the sample, which is closely related to bodily embarrassment. The women in  
21 our study also focused on concern of being judged in their discomfort around  
22 perceptions of being tested for HIV, concerns for privacy, and the importance of  
23 location of self-collection and study recruitment.  
24  
25  
26  
27

28 Another key finding from our study is the dynamic nature of embarrassment, and  
29 other psychosocial barriers, and the profound role that acknowledging and  
30 addressing psychosocial barriers can have in uptake of cervical cancer screening  
31 and treatment. Participants in our study noted that through the ASPIRE  
32 education seminars, their knowledge of early detection and treatment increased  
33 and their fear and embarrassment of screening diminished. After learning about  
34 the positive benefits of screening, they opted to screen, despite initial  
35 psychosocial barriers. White and colleagues conducted 6 focus groups and 10 in-  
36 depth of women attending VIA screening in a primary health care centre in  
37 Zambia. Women described similar worries and fears regarding the fatality of  
38 cervical cancer and the associated reluctance of screening (41). In this study,  
39 women were exposed to the education program in a local clinic in Zambia and  
40 their attitudes about screening changed as a result. This lends credence to our  
41 data and supports the importance of addressing psychosocial concerns. In fact,  
42 addressing psychosocial barriers may show greater benefit in a shorter amount  
43 of time than attempts to address other known barriers such as socio-economic  
44 status, education level, access to services, or cost of services.  
45  
46  
47  
48

#### 49 *Overcoming psychosocial barriers*

50 The participants of our study reiterated the power of local leaders and peer-to-  
51 peer education several times. In a culture that often relies on community  
52 authorities, such as *Sengas* (paternal aunties) for health information, rather than  
53 physicians, the role of these community members is vital (8). Women often  
54 discussed the role of their peers in encouraging them to come for screening and  
55 the important role that peers have in 'changing the social norm' regarding  
56  
57  
58  
59  
60

1  
2  
3 screening. What once seemed foreign and intimidating, may become familiar and  
4 approachable following the advice of a peer. This has been demonstrated among  
5 female and male sex workers in Africa in the setting of HIV/AIDS screening and  
6 treatment and has the great potential for cervical cancer screening and treatment  
7 (44).  
8  
9

10 Women also described the importance of changing the social norms around  
11 screening through media campaigns, drama groups, and overall increased  
12 awareness, similar to what has been done in the setting of HIV/AIDS. In the early  
13 stages of HIV/AIDS screening and treatment programs, the stigma and fatalism  
14 associated with an HIV/AIDS diagnosis was similar to what many women are  
15 currently reporting for cervical cancer. As antiretrovirals became more widely  
16 available, education improved, and the social norm changed around the topic,  
17 more women were willing to test. It is hoped that the same can be achieved with  
18 cervical cancer screening.  
19  
20  
21

### 22 Strengths and Limitations

23 This study is the first of its kind to specifically address embarrassment, in depth,  
24 as a psychosocial barrier to gynecologic screening. The assessment was  
25 uniquely timed following a pilot study on HPV DNA self-collection in a  
26 community-setting, so women could comment on cervical cancer screening in  
27 general and HPV DNA testing in particular. The opinions elicited in this study  
28 were also unique in incorporating those who had been exposed to previous  
29 educational screening for cervical cancer and those who had not, to provide a  
30 diversity of perspectives.  
31  
32  
33

34 This study was limited in its exploration of the multiple ethnic groups within the  
35 target community. We were able to access Luganda and Swahili speakers, but a  
36 significant Somali population exists in the community that were difficult to recruit  
37 due to language barriers. Furthermore, views of the most embarrassed women  
38 may not have been elicited given the focus group format. It may be that those  
39 women most embarrassed to discuss screening would be deterred by such a  
40 methodology. Unfortunately, an in-depth interview format, also may not reach  
41 these women.  
42  
43  
44

### 45 Conclusions and Policy Implications

46 This study demonstrates the important role of psychosocial barriers in cervical  
47 cancer screening and the factors that facilitate the modification of these barriers.  
48 The women in this study reported many of the same psychosocial barriers to  
49 screening (fear, anxiety, embarrassment, shame) as in other studies, yet they  
50 also noted that these diminished greatly with increasing knowledge and  
51 education. Participants overwhelmingly supported the role of peer-to-peer  
52 education in mitigating psychosocial barriers and facilitating screening uptake.  
53  
54

55 The results in their final form will be presented back to the local community for  
56 knowledge dissemination and the data will also play a critical role in the  
57  
58  
59  
60

1  
2  
3 development and design of a larger study exploring the clinical outcomes  
4 associated with community-based HPV self-collection versus Visual Inspection  
5 with Acetic Acid. In general, this data supports the integration of psychosocial  
6 outcomes at the onset of any screening program. In doing so, participants may  
7 experience less embarrassment and be more willing to engage in further  
8 screening and treatment activities.  
9  
10

### 11 12 13 **Acknowledgements:**

14 Doreen Birungi, Veronica Najjuma, Harriet Nanyonga, Esther Namirimu who  
15 acted as project coordinators, community health workers, and cultural  
16 consultants on this project.  
17  
18

### 19 20 **Financial support:**

21 Women's Health Research Institute, Martha Piper Foundation, University of  
22 British Columbia's Branch of Interntional Surgery. All study sponsors were not  
23 involved in the study design, collection, analysis, or decision to publish with the  
24 exception of the Women's Health Research Institute, which is chaired by Dr.  
25 Deborah M. Money, a co-author on this study.  
26  
27

### 28 **Contributorship Statement**

29  
30 Flora Teng - primary author, present at all focus groups, completed transcription,  
31 thematic analysis of data and wrote majority of manuscript.

32 Sheona Mitchell - secondary author, contributed to study design, analysis and  
33 structure of discussion, present at focus groups, edited manuscript and  
34 completed revisions.  
35

36 Musa Sekikubo - co-author, contributed to study design and secondary thematic  
37 analysis, edited manuscript.

38 Christine Biryabarema - co-author, contributed to study design and guided focus  
39 group design.  
40

41 Josaphat Byamugisha - co-author, contributed to study design and format of  
42 analysis, edited manuscript.

43 Malcolm Steinberg - co-author, advised extensively in initial study design.

44 Deborah Money - co-author, advised in initial study design and edited  
45 manuscript.  
46

47 Gina Ogilvie - lead author, advised in initial study design, thematic analysis and  
48 contributed to final editing of the manuscript.  
49  
50

### 51 **Copyright:**

52 The Corresponding Author has the right to grant on behalf of all authors and  
53 does grant on behalf of all authors, an exclusive license on a worldwide basis to  
54 the BMJ Publishing Group Ltd, and its Licensees to permit this article (if  
55  
56  
57  
58  
59  
60

accepted) to be published in BMJ Open and any other BMJ PGL products and to exploit all subsidiary rights, as set out in our license.

### Competing Interests:

None of the authors have a conflict of interest.

**Data Management and Sharing:** All authors had full access to the data of the study and accept full responsibility for the integrity of the data and the accuracy of the analysis. Thematic analysis and interview transcripts will be available from the corresponding author upon request.

## References

1. Sankaranarayanan R, Ferlay J. Worldwide burden of gynaecological cancer: the size of the problem. *Best Pract. Res. Clin. Obstet. Gynaecol.* 2006 Apr 20(2):207–25.
2. Katahoire R, Kivunibi G, Murokora D, et al. An Assessment of the Readiness for Introduction of the HPV Vaccine in Uganda. *Afr. J. Reprod. Health.* 6:159–72.
3. Ogilvie GS, Krajden M, van Niekerk DJ, et al. Primary cervical cancer screening with HPV testing compared with liquid-based cytology: results of round 1 of a randomised controlled trial -- the HPV FOCAL Study. *Br. J. Cancer.* Nature Publishing Group; 2012 Dec 4;107(12):1917–24.
4. Prevention A for CC. Improving Screening Coverage Rates of Cervical Cancer Prevention Programs: A Focus on Communities. *Cerv. Cancer Prev. Issues Depth*, No. 4. Seattle; 2004.
5. Ogilvie G, Krajden M, Maginley J, et al. Feasibility of self-collection of specimens for human papillomavirus testing in hard-to-reach women. *CMAJ* 2007 Aug 28;177(5):480–3.
6. Dzuba, IG et. al. The Acceptability of Self-Collected Samples for HPV Testing vs. the Pap Test as Alternatives in Cervical Cancer Screening. *J. Womens. Health Gen. Based. Med.* 2002;11(3).

- 1  
2  
3 7. Quincy BL, Turbow DJ, Dabinett LN. Acceptability of self-collected human  
4 papillomavirus specimens as a primary screen for cervical cancer. *J.*  
5 *Obstet. Gynaecol. (Lahore)*. 2012 Jan;32(1):87–91.
- 6  
7  
8 8. Mutyaba T, Faxelid E, Mirembe F, et al. Influences on uptake of  
9 reproductive health services in Nsangi community of Uganda and their  
10 implications for cervical cancer screening. *Reprod. Health*. 2007 Jan;4:4.
- 11  
12  
13 9. Armstrong N, James V, Dixon-Woods M. The role of primary care  
14 professionals in women's experiences of cervical cancer screening: a  
15 qualitative study. *Fam. Pract.* 2011 Nov 16;1–5.
- 16  
17  
18 10. Mangoma JF, Chirenje MZ, Chimbari MJ, et al. An Assessment of Rural  
19 Women's Knowledge, Constraints and Perceptions on Cervical Cancer  
20 Screening: The Case of Two Districts in Zimbabwe. *Afr. J. Reprod. Health*.  
21 2006 Apr 1;10(1):91.
- 22  
23  
24 11. Matejic B, Vukovic D, Pekmezovic T, et al. Determinants of preventive  
25 health behavior in relation to cervical cancer screening among the female  
26 population of Belgrade. *Health Educ. Res.* 2011 Apr;26(2):201–11.
- 27  
28  
29 12. Abdullahi A, Copping J, Kessel A, et al. Cervical screening: Perceptions  
30 and barriers to uptake among Somali women in Camden. *Public Health.*  
31 *Elsevier Ltd*; 2009 Oct;123(10):680–5.
- 32  
33  
34 13. Blomberg K, Ternstedt B, To S, et al. How do women who choose not to  
35 participate in population-based cervical cancer screening reason about  
36 their decision? *Psychooncology*. 2008;569(September 2007):561–9.
- 37  
38  
39 14. Orbell S. Pergamon COGNITION AND AFFECT AFTER CERVICAL  
40 SCREENING: THE ROLE OF PREVIOUS TEST OUTCOME AND  
41 PERSONAL OBLIGATION IN FUTURE UPTAKE EXPECTATIONS.  
42 *Science (80-. )*. 1996;43(8):1237–43.
- 43  
44  
45 15. Taylor VM, Jackson JC, Tu S-P, et al. Cervical cancer screening among  
46 Chinese Americans. *Cancer Detect. Prev.* 2002 May;26(2):139–45.
- 47  
48  
49 16. Logan L, McIlfatrick S. Exploring women's knowledge, experiences and  
50 perceptions of cervical cancer screening in an area of social deprivation.  
51 *Eur. J. Cancer Care (Engl)*. 2011 Nov;20(6):720–7.
- 52  
53  
54 17. Guilfoyle S, Franco R, Gorin SS. Exploring older women's approaches to  
55 cervical cancer screening. *Health Care Women Int*. 2007;28(10):930–50.
- 56  
57  
58  
59  
60



18. Cerigo H, Macdonald ME, Franco EL, et al. Inuit women ' s attitudes and experiences towards cervical cancer and prevention strategies in Nunavik , Quebec. *Int. J. Circumpolar Health*. 2011;70(x).
19. Watkins MM, Gabali C, Winkleby M, et al. Barriers to cervical cancer screening in rural Mexico. *Int. J. Gynecol. Cancer*. 2002;12(5):475–9.
20. Johnson CE, Mues KE, Mayne SL, et al. Cervical Cancer Screening Among Immigrants and Ethnic Minorities: A Systematic Review Using the Health Belief Model. *J. Low. Genit. Tract Dis*. 2008;12(3):232–41.
21. Burak LJ, Msn MM. Health Care for Women International Using the health belief model to examine and predict college women ' s cervical cancer screening beliefs and behavior. (July 2012):251–62.
22. Von Wagner C, Good a, Whitaker KL, et al. Psychosocial determinants of socioeconomic inequalities in cancer screening participation: a conceptual framework. *Epidemiol. Rev*. 2011 Jul [cited 2012 Jul 13];33(1):135–47.
23. Gatune JW, Nyamongo IK. An ethnographic study of cervical cancer among women in rural Kenya: is there a folk causal model? *Int. J. Gynecol. Cancer*. 2005;15(6):1049–59.
24. Richardson D, Maple K, Perry N, et al. ORIGINAL RESEARCH ARTICLE A pilot qualitative analysis of the psychosocial factors which drive young people to decline chlamydia testing in the UK: implications for health promotion and screening. 2010;187–90.
25. Consedine NS, Ladwig I, Reddig MK, et al. The many faeces of colorectal cancer screening embarrassment: preliminary psychometric development and links to screening outcome. *Br. J. Health Psychol*. 2011 Sep;16(3):559–79.
26. Mitchell S, Ogilvie G, Steinberg M, et al. Assessing women ' s willingness to collect their own cervical samples for HPV testing as part of the ASPIRE cervical cancer screening project in Uganda. *Int. J. Gynaecol. Obstet. International Federation of Gynecology and Obstetrics*; 2011 Aug;114(2):111–5.
27. Mitchell SM, Sekikubo M, Biryabarema C, et al. Factors associated with high-risk HPV positivity in a low-resource setting in sub-Saharan Africa. *Am. J. Obstet. Gynecol. Elsevier Inc*; 2013 Aug 30
28. Ogilvie GS, Mitchell S, Sekikubo M, et al. Results of a community-based cervical cancer screening pilot project using human papillomavirus self-sampling in Kampala, Uganda. *Int. J. Gynaecol. Obstet.* [Internet].



- 1  
2  
3 International Federation of Gynecology and Obstetrics; 2013  
4 Aug;122(2):118–23.  
5  
6  
7 29. Wood K, Jewkes R, Abrahams N. Cleaning the womb: constructions of  
8 cervical screening and womb cancer among rural black women in South  
9 Africa. *Soc. Sci. Med.* 1997 Jul;45(2):283–94.  
10  
11 30. Wellensiek N, Moodley M, Moodley J, et al. Knowledge of cervical cancer  
12 screening and use of cervical screening facilities among women from  
13 various socioeconomic backgrounds in Durban, Kwazulu Natal, South  
14 Africa. *Int. J. Gynecol. Cancer.* 2002;12(4):376–82.  
15  
16 31. Francis S a, Nelson J, Liverpool J, et al. Examining attitudes and  
17 knowledge about HPV and cervical cancer risk among female clinic  
18 attendees in Johannesburg, South Africa. *Vaccine.* Elsevier Ltd; 2010  
19 Nov;28(50):8026–32.  
20  
21 32. Sankaranarayanan R, Budukh a M, Rajkumar R. Effective screening  
22 programmes for cervical cancer in low- and middle-income developing  
23 countries. *Bull. World Health Organ.* 2001 Jan;79(10):954–62.  
24  
25 33. Atkinson R, Flint J. Snowball Sampling. *Encycl. Soc. Sci. Res. Methods*  
26 [Internet]. Thousand Oaks, CA: SAGE; 2003. p. 1044–5.  
27  
28 34. Ulin PR, Robinson ET, Tolley EE. *Qualitative Methods in Public Health: A*  
29 *Field Guide for Applied Research.* Jossey-Bass; 2005.  
30  
31 35. Franzosi R. Content Analysis. *Encycl. Soc. Sci. Res. Methods.* Thousand  
32 Oaks, CA: SAGE; 2003. p. 187–91.  
33  
34 36. Pope C, Ziebland S, Mays N. Analysing qualitative data. *Br. Med. J.*  
35 2000;320(January):5–7.  
36  
37 37. Mays N, Pope C. Assessing quality in qualitative research. *Br. Med. J.*  
38 2000;320(January).  
39  
40 38. Lincoln YS, Guba EG. *Naturalistic Inquiry.* Beverly Hills: SAGE  
41 Publications; 1985.  
42  
43 39. Janz NK, Champion VL, Strecher VJ. The Health Belief Model. In: Glanz K,  
44 Rimer BK, Lewis FM, editors. *Heal. Behav. Heal. Educ. Theory, Res. Pract.*  
45 3rd ed. San Francisco: Jossey-Bass; 2002. p. 45–66.  
46  
47 40. Mutyaba T, Mmiro F a, Weiderpass E. Knowledge, attitudes and practices  
48 on cervical cancer screening among the medical workers of Mulago  
49 Hospital, Uganda. *BMC Med. Educ.* 2006 Jan [cited 2011 May 27];6:13.  
50  
51  
52  
53  
54  
55  
56  
57  
58  
59  
60

- 1  
2  
3  
4  
5  
6  
7  
8  
9  
10  
11  
12  
13  
14  
15  
16  
17  
18  
19  
20  
21  
22  
23  
24  
25  
26  
27  
28  
29  
30  
31  
32  
33  
34  
35  
36  
37  
38  
39  
40  
41  
42  
43  
44  
45  
46  
47  
48  
49  
50  
51  
52  
53  
54  
55  
56  
57  
58  
59  
60
41. White HL, Mulambia C, Sinkala M, et al. "Worse than HIV" or "not as serious as other diseases"? Conceptualization of cervical cancer among newly screened women in Zambia. *Soc. Sci. Med.* Elsevier Ltd; 2012 May;74(10):1486–93.
  42. Edelman RJ. Embarrassment: The state of research. *Curr. Psychol. Rev.* [Internet]. 1981 May;1(2):125–37.
  43. Considine NS, Krivoshekova YS, Harris CR. Bodily embarrassment and judgment concern as separable factors in the measurement of medical embarrassment: psychometric development and links to treatment-seeking outcomes. *Br. J. Health Psychol.* 2007 Sep;12(Pt 3):439–62
  44. Geibel S, King'ola N, Temmerman M, et al. The impact of peer outreach on HIV knowledge and prevention behaviours of male sex workers in Mombasa, Kenya. *Sex. Transm. Infect.* 2012;88(5):357–62.

1  
2  
3  
4  
5  
6  
7  
8 12 March, 2014  
9

10 Dr. Trish Groves

11 Deputy Editor BMJ

12  
13  
14 London, UK  
15  
16  
17

18 Re: Revision of manuscript ID bmjopen-2014-004783  
19

20  
21 Dear Dr Groves,  
22

23 Thank you for accepting the manuscript Understanding the role of  
24 embarrassment in gynecologic screening: A qualitative study from the ASPIRE  
25 cervical cancer screening project in Uganda for publication with minor revisions.  
26  
27

28 The reviewers comments were very thoughtful and have been addressed in the  
29 attached documentation.  
30

31  
32 Sincerely,  
33

34  
35   
36  
37

38 Flora Fang-Hwa Teng, MD MPH

39 University of British Columbia, Department of Obstetrics and Gynecology  
40  
41  
42  
43  
44  
45  
46  
47  
48  
49  
50  
51  
52  
53  
54  
55  
56  
57  
58  
59  
60

**Title**

Understanding the role of embarrassment in gynecologic screening: A qualitative study from the ASPIRE cervical cancer screening project in Uganda

Flora F. Teng, MD, MPH, Vancouver, BC, Canada<sup>1</sup>  
Sheona M. MITCHELL, MD, MPH Vancouver, BC, Canada<sup>1</sup>  
Musa SEKIKUBO, MBChB, PhD(c), Kampala, Uganda<sup>4</sup>  
Christine BIRYABAREMA, MBChB, MSc, Kampala, Uganda<sup>4</sup>  
Josaphat K. BYAMUGISHA, MBChB, PhD, Kampala, Uganda<sup>4</sup>  
Malcolm STEINBERG MD, MSc, Vancouver, BC, Canada<sup>2,5</sup>  
Deborah M. MONEY, MD, Vancouver, BC, Canada<sup>1,3</sup>  
Gina S. OGILVIE, MD, MSc, DrPH, Vancouver, BC, Canada<sup>1,2</sup>

1. University of British Columbia, Department of Obstetrics and Gynecology
2. British Columbia Center for Disease Control
3. British Columbia's Women's Hospital, Women's Health Research Institute
4. Makerere University/Mulago National Referral Hospital Department of Obstetrics and Gynecology
5. Simon Fraser University, Faculty of Health Sciences

**Data Management and Sharing:** All authors had full access to the data of the study and accept full responsibility for the integrity of the data and the accuracy of the analysis. Thematic analysis and interview transcripts will be available from the corresponding author upon request.

**Key Words:** Embarrassment, qualitative research, cervical cancer screening, HPV self-collection, community-based participatory research

**Reprint requests:**

Dr. Gina S. Ogilvie  
655 West 12th Avenue  
Vancouver, BC  
V5Z 4R4  
Email: gina.ogilvie@bccdc.ca

**Corresponding author:**

Dr. Gina S. Ogilvie  
655 West 12th Avenue  
Vancouver, BC  
V5Z 4R4  
Email: gina.ogilvie@bccdc.ca  
Tel. +1(604) 707-5608  
Fax +1(604) 707-5604

1  
2  
3  
4  
5  
6  
7  
8 **Manuscript Word Count: 3992 (max 4000 words)**  
9

10 **Abstract**  
11

12 **Objective:** To define embarrassment and develop an understanding of the role  
13 of embarrassment in relation to cervical cancer screening and self-collected HPV  
14 DNA testing in Uganda.

15 **Design:** Cross-sectional, qualitative study using semi-structured one-to-one  
16 interviews and focus groups.

17 **Participants:** Six key-informant health workers and 16 local women, purposively  
18 sampled. Key informant inclusion criteria: Ugandan members of the project team.  
19 Focus group inclusion criteria: Woman age 30-69~~5~~ years, Luganda or Swahili  
20 speaking, living or working in the target Ugandan community. Exclusion criteria:  
21 unwillingness to sign informed consent.

22 **Setting:** Primary and tertiary low-resource setting in Kampala, Uganda

23 **Results:** In Luganda, embarrassment relating to cervical cancer is described in  
24 two forms. 'Community embarrassment' describes discomfort based upon how a  
25 person may be perceived by others. 'Personal embarrassment' relates to  
26 shyness or discomfort with her own genitalia. Community embarrassment was  
27 described in themes relating to place of study recruitment, amount of privacy in  
28 dwellings, personal relationship with health workers, handling of the vaginal  
29 swab, and misunderstanding of HPV self-collection as HIV testing. Themes of  
30 personal embarrassment related to lack knowledge, age, and novelty of the self-  
31 collection swab. Overall, embarrassment was a barrier to screening at the outset  
32 and diminished over time through education and knowledge. Fatalism regarding  
33 cervical cancer diagnosis, worry about results, and stigma associated with a  
34 cervical cancer diagnosis were other psychosocial barriers described.  
35 Overcoming psychosocial barriers to screening can include peer-to-peer  
36 education, drama, and media campaigns.

37 **Conclusions:** Embarrassment and other psychosocial barriers may play a large  
38 role at the onset of a screening program, but over time as education and  
39 knowledge increase, and the social norms around screening evolve, its role  
40 diminishes. The role of peer-to-peer education and community authorities on  
41 health care cannot be overlooked and can have a major impact in overcoming  
42 psychosocial and social barriers to screening.

43 **Abstract word count:** 298 (Max 300 words)  
44  
45  
46  
47  
48  
49  
50  
51  
52  
53  
54  
55  
56  
57  
58  
59  
60

**Strengths and limitations of this study****Strengths**

- This study is unique in the qualitative evaluation of the specific role of embarrassment in cervical cancer screening in Uganda.
- The study also provides a novel comparison between a group of women who have had previous education on cervical cancer screening compared with those who have not.

**Limitations**

- The research team was limited in its ability to explore the perspective of all ethnic groups in the target community.
- The focus group format may have been prohibitive for the most embarrassed women to participate.

## Introduction

Approximately 233,700 women die in the developing world **everyper** year from cervical cancer which is largely preventable through screening and treatable in the early stages (1). In Uganda, 80% of cervical cancer is diagnosed at stage III or IV (2) largely due to a lack of screening infrastructure. With HPV emerging as a more sensitive screening test for cervical cancer, there are opportunities for Low and Middle Income countries (LMIC) to employ this technology to prevent cervical cancer morbidity and mortality (3). Screening programs in the developed world have made strides in increasing screening uptake (4) and recent advances such as high-risk Human Papillomavirus (hrHPV) DNA testing have improved screening among the most difficult-to-reach women (5–7). The HPV vaccine is currently being offered for primary prevention in young women but the benefits will not be realized for many years to come.

Screening remains the best option for prevention and yet in LMIC, and Uganda specifically, cytologic (Papanicolaou smear) screening programs are cost-prohibitive, resource-intensive, and not widely available (8). These barriers to screening, in addition to barriers of misinformation, access, psychosocial burden, and lack of reliable treatment options make screening uptake highly challenging. If the new technologies of hrHPV DNA testing or HPV vaccination are to have any impact, a better understanding, and renewed focus on understanding a woman's motivation for screening is essential.

A significant cervical cancer screening barrier cited by women in both the developing and developed world is embarrassment (9–15). Embarrassment in gynaecologic screening is a well-known, but ill-defined phenomenon. From screening for sexually transmitted infections to cervical cancer, many women cite embarrassment as reason for not participating in screening (4,6,7,9–12,14–24) yet little is known about the specific components of screening that are most embarrassing and the wider impact this has on screening uptake and adherence. Some studies discuss lack of privacy, discomfort with sexuality, fear of judgement, and religious rationale as contributors to embarrassment (7,9,16,25). Embarrassment is commonly viewed as a static psychosocial barrier with little discussion on how it can evolve and dissipate. With such strong psychosocial barriers to screening, it follows that compliance with future testing or initiating screening at all, may be threatened.

## Context and Setting

The ASPIRE (Advances in Screening and Prevention in Reproductive Cancers - <http://www.aspireafrica.ca/>) project was created to fill the gap in early detection and treatment of cervical cancer in Uganda. To date, this collaboration has



1  
2  
3  
4  
5  
6  
7  
8 conducted a baseline survey to explore the acceptability of self-collected HPV  
9 DNA testing and attitudes towards cervical cancer screening (26,27). As well as,  
10 a feasibility study enrolling 200 women and taking them from HPV swab self-  
11 collection to colposcopy and treatment (28).  
12

13 The key results from the initial phase of the ASPIRE assessment of 300 women  
14 in a low-resource community in Uganda showed that embarrassment was cited  
15 as significant barrier to self-collection (26). Of those unwilling to collect a swab,  
16 36% reported they would be embarrassed to collect a swab at home. In contrast,  
17 of those willing to collect a swab, 2% reported that they would be embarrassed to  
18 do so. Embarrassment to collect the swab at home was a significant negative  
19 predictor for participation (AOR 0.09 95% CI: 0.03-0.29) (26).  
20

21 The objectives of this study are to define embarrassment in Uganda and develop  
22 an understanding of the role of embarrassment in relation to cervical cancer  
23 screening and self-collected HPV DNA testing. In addition, the aim is to  
24 determine viable solutions to overcoming barriers to embarrassment specifically  
25 and to cervical cancer screening overall. This study was designed to better  
26 understand embarrassment as a barrier to screening with the hope of informing  
27 the development of a prospective study investigating community-based HPV self-  
28 collection.  
29

### 30 Methods

31 We conducted key stakeholder interviews with the Ugandan ASPIRE research  
32 team which included members of the Department of Obstetrics and Gynecology  
33 at the local tertiary hospital, nurses from the local health unit, and community  
34 health workers in the target community. This method was used to obtain an initial  
35 framework to understand embarrassment in Uganda. We subsequently  
36 conducted three community focus groups to further develop these ideas, the first  
37 two groups included 8 women in each and the third group involved all  
38 participants that attended the first two focus groups. The community focus group  
39 discussion guide was developed using peer-reviewed research articles on key  
40 barriers and facilitators to cervical cancer screening (9,20,29–32) and discussion  
41 points generated within the ASPIRE key stakeholder interviews (Box 1). This  
42 methodology was used to incorporate local knowledge and cultural practice with  
43 current peer-reviewed knowledge. All participants signed informed consent and  
44 their confidentiality was ensured. This study received ethical approval from the  
45 local university in Uganda and the partner University in Canada.  
46

#### 46 Box 1. Focus Group Discussion Guide

| 47 | 48 <b>Items included in the focus group topic guide</b>                      |
|----|------------------------------------------------------------------------------|
| 49 | (1) Definition of embarrassment with regard to cervical cancer               |
| 50 | (2) Implications of embarrassment on cervical cancer screening and treatment |
| 51 | (including HPV self-collection)                                              |
| 52 | (3) Overcoming embarrassment                                                 |
| 53 |                                                                              |
| 54 |                                                                              |
| 55 |                                                                              |
| 56 |                                                                              |
| 57 |                                                                              |
| 58 |                                                                              |
| 59 |                                                                              |
| 60 |                                                                              |

- |                                                                                                                                                                    |
|--------------------------------------------------------------------------------------------------------------------------------------------------------------------|
| <p>(4) Other barriers to cervical cancer screening</p> <p>(5) Perception of cervical cancer</p> <p>(6) Evaluation and future directions for the ASPIRE project</p> |
|--------------------------------------------------------------------------------------------------------------------------------------------------------------------|

|                                                          |
|----------------------------------------------------------|
| <p><b>Items included in stakeholder consultation</b></p> |
|----------------------------------------------------------|

- |                                                                                                                     |
|---------------------------------------------------------------------------------------------------------------------|
| <p>(1-6) of the focus group topic guide</p> <p>(7) Focus group methodology</p> <p>(8) Focus group data analysis</p> |
|---------------------------------------------------------------------------------------------------------------------|

A subset of key stakeholders participated in the focus groups to facilitate discussion. Local women were invited to participate through a purposive sampling lead by the ASPIRE community health workers (33). We recruited women between the ages of 30-69 who live or work within the target community in Uganda. Using the rich knowledge of the ASPIRE community health workers, we sought information rich participants who would be willing to share their views. We recruited a total of 16 women to attend ~~the~~<sup>3</sup> focus groups. The first focus group was comprised of 8 previous participants in the ASPIRE project. The second focus group was comprised of 8 women naïve to the ASPIRE project. The third focus group was conducted with all 16 women to review results, disseminate the findings, and seek clarification on any underdeveloped ideas. This recruitment strategy was specifically chosen to capture diverse perspectives from an experienced group and a naïve group. We hypothesized that the ASPIRE-experienced group would describe less embarrassment than the ASPIRE-~~n~~Naïve group. The community health workers involved in the project acted as focus group facilitators and the ASPIRE project coordinator (DB) assisted in translation and cultural interpretation of the results. Transcription and thematic analysis was undertaken following each focus group, with the goal of generating new ideas for discussion in subsequent groups. The topics were flexible and driven by the focus-group participants, in keeping with the foundation of qualitative research (34).

#### Data collection and Analysis

All stakeholder interviews and focus group discussions were audiotaped and transcribed by the primary researcher (FT) and Luganda translator (DB). Workshops were undertaken in Luganda and English. The English portion of the audiotape was transcribed. The Luganda translator reviewed the audiotape and written transcript to verify appropriate translation and content. During the second review, the translator also assisted as cultural liaison to ensure that the data correctly reflected the Ugandan cultural context. A thematic analysis was undertaken after the each focus group and the code structure was refined with each analysis. The stakeholder interviews were analyzed and reported in the Results and were also used to inform content of the discussion guide used for subsequent focus groups.

A final thematic analysis was undertaken at the conclusion of the three workshops by FT and the data was presented to the participants at a final meeting to ensure that the content was correct and reflective of the intentions of the group (35). The coding structure was developed using grounded theory and content analysis (36). A second independent thematic analysis was undertaken by MS to enhance inter-rater reliability (37) and to ensure that all themes were internally convergent and externally divergent, meaning that categories were structured so that they were internally consistent, but distinct from one another. (38) Following the development of the code structure, a framework analysis was undertaken using the Health Belief Model (39). This framework has been utilized in understanding screening behaviours, preventative actions, illness behaviour and has been well-validated in these settings (20,21,39).

## Results

### Demographics

Of the 16 women that we surveyed, the average age was 44 years old with a range between 30 and 57. The majority of women were married (50%) and had attended primary school with or without some secondary education (75%). Eighty-eight percent worked outside ~~and~~ the home ~~and~~; lived in the target district in Kampala, within 30 minutes from the health centre (Table 1).

Table 1.

| Demographic <del>characteristics</del> <u>of characteristics</u> of focus group participants (n=16)* |                                                  | Number of <del>Participants</del> <u>Participants (%)</u> |
|------------------------------------------------------------------------------------------------------|--------------------------------------------------|-----------------------------------------------------------|
| Characteristic                                                                                       |                                                  |                                                           |
| Age groups                                                                                           |                                                  |                                                           |
|                                                                                                      | 26-30                                            | 2 ( <del>13</del> )                                       |
|                                                                                                      | 31-35                                            | 4 ( <del>25</del> )                                       |
|                                                                                                      | 36-40                                            | 1 ( <del>6</del> )                                        |
|                                                                                                      | 41-45                                            | 1 ( <del>6</del> )                                        |
|                                                                                                      | 46-50                                            | 0 ( <del>0</del> )                                        |
|                                                                                                      | 51-55                                            | 5 ( <del>31</del> )                                       |
|                                                                                                      | 56-60                                            | 3 ( <del>19</del> )                                       |
| Marital Status                                                                                       |                                                  |                                                           |
|                                                                                                      | Single                                           | 7 ( <del>44</del> )                                       |
|                                                                                                      | Married                                          | 8 ( <del>50</del> )                                       |
|                                                                                                      | Widowed                                          | 1 ( <del>6</del> )                                        |
| Education of the participant                                                                         |                                                  |                                                           |
|                                                                                                      | No schooling or some primary schooling           | 1 ( <del>6</del> )                                        |
|                                                                                                      | Primary with or without some secondary schooling | 12 ( <del>75</del> )                                      |
|                                                                                                      | Secondary                                        | 1 ( <del>6</del> )                                        |

|                                                                |                     |                    |
|----------------------------------------------------------------|---------------------|--------------------|
|                                                                | Postsecondary       | 2 <del>(13)</del>  |
| Work outside of home                                           |                     |                    |
|                                                                | No                  | 2 <del>(13)</del>  |
|                                                                | Yes                 | 14 <del>(88)</del> |
| Live in Kisenyi                                                |                     |                    |
|                                                                | No                  | 2 <del>(13)</del>  |
|                                                                | Yes                 | 14 <del>(88)</del> |
| Housing                                                        |                     |                    |
|                                                                | Rent                | 10 <del>(63)</del> |
|                                                                | Own                 | 6 <del>(38)</del>  |
| Religion                                                       |                     |                    |
|                                                                | 7th Day Adventist   | 1 <del>(6)</del>   |
|                                                                | Anglican/protestant | 4 <del>(25)</del>  |
|                                                                | Catholic            | 5 <del>(31)</del>  |
|                                                                | Muslim              | 6 <del>(38)</del>  |
| Time to walk to nearest health center, min                     |                     |                    |
|                                                                | < 30                | 14 <del>(88)</del> |
|                                                                | 30 - 60             | 2 <del>(13)</del>  |
| * values for some variables do not sum to 100% due to rounding |                     |                    |

### Perceived Susceptibility

Women perceived themselves to be at low risk for HPV infection, but the HIV screening model influenced perceptions for HPV screening. They could understand the need for HPV screening from their knowledge of the HIV paradigm. For some women, there was a belief that testing was only necessary for sexually active women. Similarly for cervical cancer, women perceived themselves to be at low risk and there was a lack of knowledge regarding the relationship between HPV and cervical cancer. In addition, most people do not seek care unless there are symptoms. One woman highlighted,

*“For Africans its hard to go to the hospital if you are not sick. You have to actually be sick in bed before you will go for treatment.” (Focus Group 1 – Previous ASPIRE Participant)*

### Perceived Severity

Women acknowledged a sense of fatalism regarding cancer and felt that ‘knowing their status’ would be a situation too difficult to cope with. In addition, they didn’t want to worry about the outcome. They felt that worrying would make the disease worse. One woman described,

*“They don’t want to know their [cervical cancer screening] status because if they know their status, they don’t see any solution. They*

1  
2  
3  
4  
5  
6  
7  
8  
9  
10  
11  
12  
13  
14  
15  
16  
17  
18  
19  
20  
21  
22  
23  
24  
25  
26  
27  
28  
29  
30  
31  
32  
33  
34  
35  
36  
37  
38  
39  
40  
41  
42  
43  
44  
45  
46  
47  
48  
49  
50  
51  
52  
53  
54  
55  
56  
57  
58  
59  
60

*will just die, there is no treatment, there is nothing to be fixed. It is like a death sentence.” (Key Stakeholder Interview)*

Surprisingly, some described that they would rather have HIV because there is a perception that there is an effective treatment, compared to a cancer diagnosis that has no cure.

*“Nowadays, people say that if someone to gets cancer, at least let her get HIV, than getting cancer, because for HIV there is treatment, but for cancer, there is no treatment.” (Focus Group 2 – ASPIRE Naïve Participant)*

There were also some women who felt that the testing and/or biopsy would actually cause cancer. Some women perceived that before they got a biopsy/test they were healthy and after the test, they were sick, so it must have been the test that made them sick. Women were ~~also~~ concerned about the overbearing cost of cancer treatment in LMIC. Alternatively, those women who had an awareness of HPV perceived that HPV could be treated and this diagnosis was less severe.

#### Perceived Benefits and Cues to Action

The women in both focus groups universally acknowledged that embarrassment would not be a major deterrent to screening if women had appropriate knowledge and education about the need for screening and if they had a private place to perform the self-collection. All women endorsed peer-to-peer education and engaging local leaders as some of the best strategies to recruit women and in fact, many women had already told their friends about the project and were eager to participate in the next phase of the ASPIRE project.

*“Through these people who have self-collected and through more training, they also help those who have never attended the training, who have never self-collected, to make them be confident that self-collection is not painful. You do it yourself, it’s not the doctor doing it. I think that through them, more people will come to do the self-collection.” (Focus Group 1 – ASPIRE Participant)*

Overall participants did not see large barriers to expanding the project, capacity building and resources, notwithstanding. The women were very positive that further recruitment and screening would not be a barrier. The history of the ASPIRE project since 2008 and the ongoing education initiatives have already ‘sensitized’ women to the topic. Some women articulated their knowledge of the importance of screening and the ability to diagnose and treat the disease early. They had a variety of suggestions such as media messages, seminars and workshops, counselling sessions, incentives, as a means to improve uptake for screening.

*Barriers to cervical cancer screening*

1  
2  
3  
4  
5  
6  
7  
8  
9  
10  
11  
12  
13  
14  
15  
16  
17  
18  
19  
20  
21  
22  
23  
24  
25  
26  
27  
28  
29  
30  
31  
32  
33  
34  
35  
36  
37  
38  
39  
40  
41  
42  
43  
44  
45  
46  
47  
48  
49  
50  
51  
52  
53  
54  
55  
56  
57  
58  
59  
60

Barriers to cervical cancer screening and HPV self-collection could easily be divided into barriers inherent to screening in general, barriers related to the use of the HPV swab, and overarching barriers related to the outcomes of the test (Table 2). Our focus group participants felt that cervical cancer screening in general was predicated upon trust in the researchers, adequate knowledge and an awareness of their risk of cervical cancer. One woman felt that a major barrier to screening was the worry that screening would incite, she described,

*“What if I get my sample. What results will I get? That fear of getting the results, ... Am I positive? Am I negative? Really people fear to hear what [results] they will get, so they end up saying, I'd rather not test. I'd rather not collect, so that I may not know any results about what is happening to me.”* ([Focus Group 1 – ASPIRE Participant](#))

The women had valuable insight into the barriers associated with HPV self-collection. Many women admitted to the initial novelty of the swab and discomfort with inserting items into the vagina as barriers. Women were also concerned of the swab causing infection or injury. For one group, there was significant discussion regarding hygiene and the cleanliness of vaginal discharge. Closely related to this was the associated embarrassment of having to give a swab of vaginal secretions (with a potential smell) to a health worker.

#### *Gender perspective*

Interestingly, barriers that were not endorsed included spousal permission and cultural beliefs, practices, and norms. When questioned, women were universally in support of screening whether they had spousal permission or not. One woman alluded to the mistrust and lack of communication within marriages as a source of HPV risk and as a result felt strongly about the importance of screening.

*“You have to take care of your life. You can't say that my husband refused me to go for testing. It is not his life, its mine. You have to protect your life.”* ([Focus Group 2 – ASPIRE Naïve Participant](#))

*“These men, they always go for treatment. Like an example for HIV. they test and they are positive. They start the treatment without telling their wives, so he keeps on going for treatment, when the wife doesn't know anything. So everyone is concerned about his or her life.”* ([Focus Group 2 – ASPIRE Naïve Participant](#))

Women in Kisenyi also described cultural practices that normalized the insertion of items into the vagina. Not all women endorsed this activity, but some women reported inserting herbs to widen the birth canal during the later stages of pregnancy, which provided some women a comfort with their genitalia.

*“I don't think it has to do with shyness, because women they actually douche, they use herbs for all sorts of things. Even when they are*

1  
2  
3  
4  
5  
6  
7  
8  
9  
10  
11  
12  
13  
14  
15  
16  
17  
18  
19  
20  
21  
22  
23  
24  
25  
26  
27  
28  
29  
30  
31  
32  
33  
34  
35  
36  
37  
38  
39  
40  
41  
42  
43  
44  
45  
46  
47  
48  
49  
50  
51  
52  
53  
54  
55  
56  
57  
58  
59  
60

| *pregnant, they use herbs, it is in most of cultures here, particularly in central Uganda, you use herbs to enlarge your birth canal to make sure you don't get an episiotomy.” (Key Stakeholder Interview)*

For peer review only

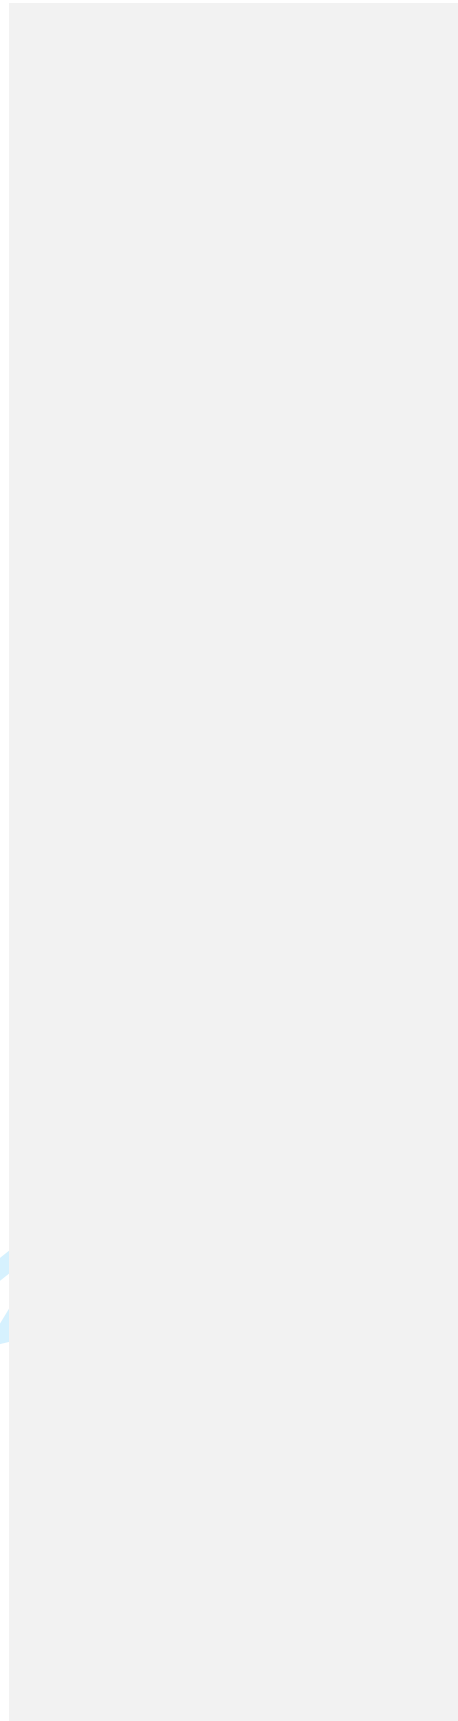



Table 2. Health Belief Model Framework Analysis

| Health Belief Model Parameter | ASPIRE Respondents                                                                                                                                                               |                                                                                                                                                  |
|-------------------------------|----------------------------------------------------------------------------------------------------------------------------------------------------------------------------------|--------------------------------------------------------------------------------------------------------------------------------------------------|
|                               | HPV Self-Collection                                                                                                                                                              | Cervical Cancer                                                                                                                                  |
| Perceived Susceptibility      | Perceived risk is low<br>Testing will cause the disease<br>Screening is only necessary for sexually active women                                                                 |                                                                                                                                                  |
|                               | HIV education model increases risk awareness                                                                                                                                     | Limited knowledge of link between HPV and cervical cancer                                                                                        |
| Perceived Severity            | HPV can be treated                                                                                                                                                               | Cervical cancer is a death sentence<br>Cervical cancer treatment is expensive<br>No cure for cancer<br>Would rather get HIV than cervical cancer |
| Perceived Benefits            | Early detection<br>Treatment availability<br>Protecting yourself                                                                                                                 | Some treatment may be beneficial                                                                                                                 |
| Perceived Barriers            | Lack of time<br>Lack of knowledge<br>Mistrust of Researchers<br>Embarrassment<br>Worry about outcomes<br>Health-seeking behaviour only prompted by symptoms                      |                                                                                                                                                  |
|                               | Discomfort with inserting items into vagina<br>Concern with hygiene and/or vaginal discharge<br>Fear of pain or injury<br>Novelty of test                                        | Fatalism<br>Inability to cope with results<br>Stigma of having cancer                                                                            |
| Cues to Action                | Local Leaders / Community Health workers<br>Peer-to-Peer education and recruitment<br>Increasing knowledge<br>Screening necessary without symptoms<br>Fear of contracting cancer |                                                                                                                                                  |
| Self-efficacy                 | <a href="#">Gender Perspective</a> - Spousal permission not required                                                                                                             |                                                                                                                                                  |

### Embarrassment

There were many overlapping themes with barriers to screening and the associated embarrassment. Through our focus groups and key stakeholder discussions, there were two meaningful definitions of embarrassment. The first definition was 'community embarrassment' ('kiswaaza" in Luganda). It was described as the discomfort that one may feel depending on how they are perceived by others. The second can be described as 'personal embarrassment' ('kikuswaaza' in Luganda) or shyness/discomfort related to their own genitalia (Table 3).

Table 3.

#### Factors associated with embarrassment

| Community Embarrassment                      |
|----------------------------------------------|
| Confusion of HPV for HIV                     |
| Place of recruitment                         |
| Location of self-collection                  |
| Privacy                                      |
| Relationship with health worker              |
| Gender of the physician performing screening |
| Handling of the swab                         |
| Personal Embarrassment                       |
| Age of participant                           |
| Novelty of the test                          |
| lack of knowledge                            |

An important theme was the diminishment of embarrassment over time. In the group of women with previous involvement in the ASPIRE project, they described having embarrassment initially, but after multiple education meetings and actually performing self-collection, they didn't feel embarrassed about screening. In fact, they noted that they would overcome their embarrassment if they knew they needed to for another reason. This was clearly described by this participant,

*"After knowing that you are HPV positive, then the fear goes away because you want to know what is going on, so you are free to go to the doctor to have the pelvic examination to see what is going on ... you need to know what next. See the doctor at that stage, no embarrassment."* [\*\(Focus Group 3 – Participant\)\*](#)

The data demonstrates that embarrassment is not a static emotion. It is often quoted as an important barrier to screening, yet its not acknowledged as potentially the most modifiable barrier, compared to other factors such as age, socioeconomic status, and religion. This woman describes the modifiability of embarrassment,

1  
2  
3  
4  
5  
6  
7  
8  
9  
10  
11  
12  
13  
14  
15  
16  
17  
18  
19  
20  
21  
22  
23  
24  
25  
26  
27  
28  
29  
30  
31  
32  
33  
34  
35  
36  
37  
38  
39  
40  
41  
42  
43  
44  
45  
46  
47  
48  
49  
50  
51  
52  
53  
54  
55  
56  
57  
58  
59  
60

*“Embarrassment is not an issue concerning cervical cancer, Because HIV is very shameful compared to cancer. Nowadays people don't feel ashamed because of HIV because they are used to it. So even with cancer, people will get used to it and there will be no more embarrassment, it's not an issue. Through more training and seminars, people will get to know more, they will come to self-collection and everything will be okay.” (Focus Group 3 – Participant)*

#### *Perceived Benefits and Cues to Action*

*The women in both focus groups universally acknowledged that embarrassment would not be a major deterrent to screening if women had appropriate knowledge and education about the need for screening and if they had a private place to perform the self-collection. All women endorsed peer-to-peer education and engaging local leaders as some of the best strategies to recruit women and in fact, many women had already told their friends about the project and were eager to participate in the next phase of the ASPIRE project.*

*“Through these people who have self-collected and through more training, they also help those who have never attended the training, who have never self-collected, to make them be confident that self-collection is not painful. You do it yourself, it's not the doctor doing it. I think that through them, more people will come to do the self-collection.”*

*Overall participants did not see large barriers to expanding the project, capacity building and resources, notwithstanding. The women were very positive that further recruitment and screening would not be a barrier. The history of the ASPIRE project since 2008 and the ongoing education initiatives have already 'sensitized' women to the topic. Some women articulated their knowledge of the importance of screening and the ability to diagnose and treat the disease early. They had a variety of suggestions such as media messages, seminars and workshops, counselling sessions, incentives, as a means to improve uptake for screening.*

#### Discussion

In the setting of a largely preventable condition and the availability of a vaccine, it is a great tragedy that cases of cervical cancer continue to rise and that more research is not being done on the science of implementation. Significant research is focused on screening sensitivity, specificity, vaccine targets and efficacy, but the most important of these factors is whether people will engage in screening and vaccination. This study is uniquely focused on implementation and engagement of the local women in a low-resource community in Uganda in a

Formatted: [Normal], Left, Indent: Left: 0.39", Right: 0.39"

novel screening program that has the potential to make cervical cancer screening widely available in the community where people live and work.

The medical literature provides a limited discussion of the psychosocial aspects of screening and these factors play a vital role in screening uptake and ongoing engagement with the patient. One study by Mutyaba and colleagues demonstrates that screening among medical professionals, who are charged with carrying out screening, is low (40). If even medical workers, who are meant to be the most informed are reluctant to partake in screening, then much work needs to be done to change the paradigm.

#### *Health Belief Model*

The Health Belief Model provides an important framework upon which to understand cervical cancer screening uptake and treatment. Our study fits into the overall context of the Health Belief Model with a specific focus on embarrassment. We found that women did not perceive themselves to be at great risk of cervical cancer, but that they perceived the diagnosis to be quite severe and fatal. They did not see the benefit of screening if results would only cause worry and a definitive treatment was not available. For those who had the knowledge that the disease could be caught early and treated, that was a significant cue to action to initiate screening. These findings are consistent with other studies exploring cervical cancer screening behaviour (8,20,21,29,41).

#### *Embarrassment*

Although several themes emerged, many of these have been described previously but by focusing on an analysis of embarrassment specifically we found that the women of Kisenyi defined embarrassment in two forms, community embarrassment and personal embarrassment, ~~which are consistent with the literature.~~ The first is closely related to a definition by the psychology literature which describes embarrassment as the uncomfortable, self-conscious, feeling a person has following the transgression of a social norm or rule (42). This is in relation to a real, or perceived, other person. Personal embarrassment is closely related to shame, which differs in that it is defined by a person's uncomfortable feeling with one's self (42).

The majority of the research regarding embarrassment and health screening is in the colorectal screening literature. In this setting, Consedine and colleagues sought to further characterize embarrassment by focusing on the specific aspects of the colorectal screening encounter that engendered embarrassment. They were able to discern a distinct phenomenon called medical embarrassment which is specific to the medical encounter and is not indicative of trait embarrassment (43). Medical embarrassment was further subdivided by Consedine into bodily embarrassment and judgment concern. In his research, these two factors were shown to have significant impact in screening behaviour (25,43). Women in our study were concerned with handling of swab and the potential associated smell of the sample, which is closely related to bodily embarrassment. The women in

our study also focused on ~~judgement~~ concern of being judged in their discomfort around perceptions of being tested for HIV, concerns for privacy, and the importance of location of self-collection and study recruitment.

Another key finding from our study is the dynamic nature of embarrassment, and other psychosocial barriers, and the profound role that acknowledging and addressing psychosocial barriers can have in uptake of cervical cancer screening and treatment. Participants in our study noted that through the ASPIRE education seminars, their knowledge of early detection and treatment increased and their fear and embarrassment of screening diminished. After learning about the positive benefits of screening, they opted to screen, despite initial psychosocial barriers. White and colleagues conducted 6 focus groups and 10 in-depth of women attending VIA screening in a primary health care centre in Zambia. Women described similar worries and fears regarding the fatality of cervical cancer and the associated reluctance of screening (41). In this study, women were exposed to the education program in a local clinic in Zambia and their attitudes about screening changed as a result. This lends credence to our data and supports the importance of addressing psychosocial concerns. In fact, addressing psychosocial barriers may show greater benefit in a shorter amount of time, ~~than~~ attempts to address other known ~~ba~~erriers such as socio-economic status, education level, access to services, or cost of services.

#### *Overcoming psychosocial barriers*

The participants of our study reiterated the power of local leaders and peer-to-peer education several times. In a culture that often relies on community authorities, such as *Sengas* (paternal aunties) for health information, rather than physicians, the role of these community members is vital (8). Women often discussed the role of their peers in encouraging them to come for screening and the important role that peers have in 'changing the social norm' regarding screening. What once seemed foreign and intimidating, may become familiar and approachable following the advice of a peer. This has been demonstrated among female and male sex workers in Africa in the setting of HIV/AIDS screening and treatment and has the great potential for cervical cancer screening and treatment (44).

Women also described the importance of changing the social norms around screening through media campaigns, drama groups, and overall increased awareness, similar to what has been done in the setting of HIV/AIDS. In the early stages of HIV/AIDS screening and treatment programs, the stigma and fatalism associated with an HIV/AIDS diagnosis was similar to what many women are currently reporting for cervical cancer. As antiretrovirals became more widely available, education improved, and the social norm changed around the topic, more women were willing to test. It is hoped that the same can be achieved with cervical cancer screening.

#### Strengths and Limitations

1  
2  
3  
4  
5  
6  
7  
8  
9  
10  
11  
12  
13  
14  
15  
16  
17  
18  
19  
20  
21  
22  
23  
24  
25  
26  
27  
28  
29  
30  
31  
32  
33  
34  
35  
36  
37  
38  
39  
40  
41  
42  
43  
44  
45  
46  
47  
48  
49  
50  
51  
52  
53  
54  
55  
56  
57  
58  
59  
60

This study is the first of its kind to specifically address embarrassment, in depth, as a psychosocial barrier to gynecologic screening. The assessment was uniquely timed following a pilot study on HPV DNA self-collection in a community-setting, so women could comment on cervical cancer screening in general and HPV DNA testing in particular. The opinions elicited in this study were also unique in incorporating those who had been exposed to previous educational screening for cervical cancer and those who had not, to provide a diversity of perspectives.

This study was limited in its exploration of the multiple ethnic groups within the target community. We were able to access Luganda and Swahili speakers, but a significant Somali population exists in the community that were difficult to recruit due to language barriers. Furthermore, views of the most embarrassed women may not have been elicited given the focus group format. It may be that those women most embarrassed to discuss screening would be deterred by such a methodology. Unfortunately, an in-depth interview format, also may not reach these women.

#### Conclusions and Policy Implications

This study demonstrates the important role of psychosocial barriers in cervical cancer screening and the factors that facilitate the modification of these barriers. The women in this study reported many of the same psychosocial barriers to screening (fear, anxiety, embarrassment, shame) as in other studies, yet they also noted that these diminished greatly with increasing knowledge and education. Participants overwhelmingly supported the role of peer-to-peer education in mitigating psychosocial barriers and facilitating screening uptake.

The results in their final form will be presented back to the local community for knowledge dissemination and the data will also play a critical role in the development and design of a larger study exploring the clinical outcomes associated with community-based HPV self-collection versus Visual Inspection with Acetic Acid. In general, this data supports the integration of psychosocial outcomes at the onset of any screening program. In doing so, participants may experience less embarrassment and be more willing to engage in further screening and treatment activities.

#### Competing Interests:

None of the authors have a conflict of interest.

#### Financial support:

Women's Health Research Institute, Martha Piper Foundation, University of British Columbia's Branch of International Surgery. All study sponsors were not involved in the study design, collection, analysis, or decision to publish with the

1  
2  
3  
4  
5  
6  
7  
8 exception of the Women's Health Research Institute, which is chaired by Dr.  
9 Deborah M. Money, a co-author on this study.  
10

11  
12 **Acknowledgements:**

13 Doreen Birungi, Veronica Najjuma, Harriet Nanyonga, Esther Namirimu who  
14 acted as project coordinators, community health workers, and cultural  
15 consultants on this project.  
16

17 **Copyright:**

18 The Corresponding Author has the right to grant on behalf of all authors and  
19 does grant on behalf of all authors, an exclusive license on a worldwide basis to  
20 the BMJ Publishing Group Ltd, and its Licensees to permit this article (if  
21 accepted) to be published in BMJ Open and any other BMJ PGL products and to  
22 exploit all subsidiary rights, as set out in our license.  
23  
24  
25  
26  
27  
28  
29  
30  
31  
32  
33  
34  
35  
36  
37

38 **References**

- 39  
40  
41 1. Sankaranarayanan R, Ferlay J. Worldwide burden of gynaecological  
42 cancer: the size of the problem. *Best Pract. Res. Clin. Obstet. Gynaecol.*  
43 2006 Apr 20(2):207–25.  
44  
45 2. Katahoire R, Kivunibi G, Murokora D, Arube Wani J, Siu G, Arinaitwe L. An  
46 Assessment of the Readiness for Introduction of the HPV Vaccine in  
47 Uganda. *Afr. J. Reprod. Health.* 6:159–72.  
48  
49 3. Ogilvie GS, Krajdén M, van Niekerk DJ, Martin RE, Ehlen TG, Ceballos K,  
50 et al. Primary cervical cancer screening with HPV testing compared with  
51 liquid-based cytology: results of round 1 of a randomised controlled trial --  
52  
53  
54  
55  
56  
57  
58  
59  
60



- 1  
2  
3  
4  
5  
6  
7  
8 the HPV FOCAL Study. *Br. J. Cancer*. Nature Publishing Group; 2012 Dec  
9 4;107(12):1917–24.  
10  
11 4. Prevention A for CC. Improving Screening Coverage Rates of Cervical  
12 Cancer Prevention Programs: A Focus on Communities. *Cerv. Cancer*  
13 *Prev. Issues Depth*, No. 4. Seattle; 2004.  
14  
15 5. Ogilvie G, Kraiden M, Maginley J, Isaac-Renton J, Hislop G, Elwood-Martin  
16 R, et al. Feasibility of self-collection of specimens for human papillomavirus  
17 testing in hard-to-reach women. *CMAJ* 2007 Aug 28;177(5):480–3.  
18  
19 6. Dzuba, IG et. al. The Acceptability of Self-Collected Samples for HPV  
20 Testing vs. the Pap Test as Alternatives in Cervical Cancer Screening. *J.*  
21 *Womens. Health Gen. Based. Med.* 2002;11(3).  
22  
23 7. Quincy BL, Turbow DJ, Dabinett LN. Acceptability of self-collected human  
24 papillomavirus specimens as a primary screen for cervical cancer. *J.*  
25 *Obstet. Gynaecol. (Lahore)*. 2012 Jan;32(1):87–91.  
26  
27 8. Mutyaba T, Faxelid E, Mirembe F, Weiderpass E. Influences on uptake of  
28 reproductive health services in Nsangi community of Uganda and their  
29 implications for cervical cancer screening. *Reprod. Health*. 2007 Jan;4:4.  
30  
31 9. Armstrong N, James V, Dixon-Woods M. The role of primary care  
32 professionals in women's experiences of cervical cancer screening: a  
33 qualitative study. *Fam. Pract.* 2011 Nov 16;1–5.  
34  
35 10. Mangoma JF, Chirenje MZ, Chimbari MJ, Chandiwana SK. An Assessment  
36 of Rural Women's Knowledge, Constraints and Perceptions on Cervical  
37 Cancer Screening: The Case of Two Districts in Zimbabwe. *Afr. J. Reprod.*  
38 *Health*. 2006 Apr 1;10(1):91.  
39  
40 11. Matejic B, Vukovic D, Pekmezovic T, Kesic V, Markovic M. Determinants of  
41 preventive health behavior in relation to cervical cancer screening among  
42 the female population of Belgrade. *Health Educ. Res.* 2011 Apr;26(2):201–  
43 11.  
44  
45 12. Abdullahi A, Copping J, Kessel A, Luck M, Bonell C. Cervical screening:  
46 Perceptions and barriers to uptake among Somali women in Camden.  
47 *Public Health*. Elsevier Ltd; 2009 Oct;123(10):680–5.  
48  
49 13. Blomberg K, Ternstedt B, To S, Tishelman C. How do women who  
50 choose not to participate in population-based cervical cancer screening  
51 reason about their decision? *Psychooncology*. 2008;569(September  
52 2007):561–9.  
53  
54  
55  
56  
57  
58  
59  
60

14. Orbell S, Pergamon COGNITION AND AFFECT AFTER CERVICAL SCREENING: THE ROLE OF PREVIOUS TEST OUTCOME AND PERSONAL OBLIGATION IN FUTURE UPTAKE EXPECTATIONS. *Science (80-. )*. 1996;43(8):1237–43.
15. Taylor VM, Jackson JC, Tu S-P, Yasui Y, Schwartz SM, Kuniyuki A, et al. Cervical cancer screening among Chinese Americans. *Cancer Detect. Prev.* 2002 May;26(2):139–45.
16. Logan L, McIlfratrick S. Exploring women's knowledge, experiences and perceptions of cervical cancer screening in an area of social deprivation. *Eur. J. Cancer Care (Engl)*. 2011 Nov;20(6):720–7.
17. Guilfoyle S, Franco R, Gorin SS. Exploring older women's approaches to cervical cancer screening. *Health Care Women Int.* 2007;28(10):930–50.
18. Cerigo H, Macdonald ME, Franco EL, Brassard P. Inuit women's attitudes and experiences towards cervical cancer and prevention strategies in Nunavik, Quebec. *Int. J. Circumpolar Health*. 2011;70(x).
19. Watkins MM, Gabali C, Winkleby M, Gaona E, Lebaron S. Barriers to cervical cancer screening in rural Mexico. *Int. J. Gynecol. Cancer*. 2002;12(5):475–9.
20. Johnson CE, Mues KE, Mayne SL, Kiblawi AN. Cervical Cancer Screening Among Immigrants and Ethnic Minorities: A Systematic Review Using the Health Belief Model. *J. Low. Genit. Tract Dis*. 2008;12(3):232–41.
21. Burak LJ, Msn MM. Health Care for Women International Using the health belief model to examine and predict college women's cervical cancer screening beliefs and behavior. (July 2012):251–62.
22. Von Wagner C, Good a, Whitaker KL, Wardle J. Psychosocial determinants of socioeconomic inequalities in cancer screening participation: a conceptual framework. *Epidemiol. Rev.* 2011 Jul [cited 2012 Jul 13];33(1):135–47.
23. Gatune JW, Nyamongo IK. An ethnographic study of cervical cancer among women in rural Kenya: is there a folk causal model? *Int. J. Gynecol. Cancer*. 2005;15(6):1049–59.
24. Richardson D, Maple K, Perry N, Ambler E, Jurd C, Fisher M. ORIGINAL RESEARCH ARTICLE A pilot qualitative analysis of the psychosocial factors which drive young people to decline chlamydia testing in the UK: implications for health promotion and screening. 2010;187–90.

- 1
  - 2
  - 3
  - 4
  - 5
  - 6
  - 7
  - 8
  - 9
  - 10
  - 11
  - 12
  - 13
  - 14
  - 15
  - 16
  - 17
  - 18
  - 19
  - 20
  - 21
  - 22
  - 23
  - 24
  - 25
  - 26
  - 27
  - 28
  - 29
  - 30
  - 31
  - 32
  - 33
  - 34
  - 35
  - 36
  - 37
  - 38
  - 39
  - 40
  - 41
  - 42
  - 43
  - 44
  - 45
  - 46
  - 47
  - 48
  - 49
  - 50
  - 51
  - 52
  - 53
  - 54
  - 55
  - 56
  - 57
  - 58
  - 59
  - 60
25. Consedine NS, Ladwig I, Reddig MK, Broadbent E a. The many faeces of colorectal cancer screening embarrassment: preliminary psychometric development and links to screening outcome. *Br. J. Health Psychol.* 2011 Sep;16(3):559–79.
26. Mitchell S, Ogilvie G, Steinberg M, Sekikubo M, Biryabarema C, Money D. Assessing women’s willingness to collect their own cervical samples for HPV testing as part of the ASPIRE cervical cancer screening project in Uganda. *Int. J. Gynaecol. Obstet. International Federation of Gynecology and Obstetrics*; 2011 Aug;114(2):111–5.
27. Mitchell SM, Sekikubo M, Biryabarema C, Byamugisha JJK, Steinberg M, Jeronimo J, et al. Factors associated with high-risk HPV positivity in a low-resource setting in sub-Saharan Africa. *Am. J. Obstet. Gynecol. Elsevier Inc*; 2013 Aug 30
28. Ogilvie GS, Mitchell S, Sekikubo M, Biryabarema C, Byamugisha J, Jeronimo J, et al. Results of a community-based cervical cancer screening pilot project using human papillomavirus self-sampling in Kampala, Uganda. *Int. J. Gynaecol. Obstet. [Internet]. International Federation of Gynecology and Obstetrics*; 2013 Aug;122(2):118–23.
29. Wood K, Jewkes R, Abrahams N. Cleaning the womb: constructions of cervical screening and womb cancer among rural black women in South Africa. *Soc. Sci. Med.* 1997 Jul;45(2):283–94.
30. Wellensiek N, Moodley M, Moodley J, Nkwanyana N. Knowledge of cervical cancer screening and use of cervical screening facilities among women from various socioeconomic backgrounds in Durban, Kwazulu Natal, South Africa. *Int. J. Gynecol. Cancer.* 2002;12(4):376–82.
31. Francis S a, Nelson J, Liverpool J, Soogun S, Mofammere N, Thorpe RJ. Examining attitudes and knowledge about HPV and cervical cancer risk among female clinic attendees in Johannesburg, South Africa. *Vaccine. Elsevier Ltd*; 2010 Nov;28(50):8026–32.
32. Sankaranarayanan R, Budukh a M, Rajkumar R. Effective screening programmes for cervical cancer in low- and middle-income developing countries. *Bull. World Health Organ.* 2001 Jan;79(10):954–62.
33. Atkinson R, Flint J. Snowball Sampling. *Encycl. Soc. Sci. Res. Methods [Internet]. Thousand Oaks, CA: SAGE*; 2003. p. 1044–5.
34. Ulin PR, Robinson ET, Tolley EE. *Qualitative Methods in Public Health: A Field Guide for Applied Research.* Jossey-Bass; 2005.

- 1
  - 2
  - 3
  - 4
  - 5
  - 6
  - 7
  - 8
  - 9
  - 10
  - 11
  - 12
  - 13
  - 14
  - 15
  - 16
  - 17
  - 18
  - 19
  - 20
  - 21
  - 22
  - 23
  - 24
  - 25
  - 26
  - 27
  - 28
  - 29
  - 30
  - 31
  - 32
  - 33
  - 34
  - 35
  - 36
  - 37
  - 38
  - 39
  - 40
  - 41
  - 42
  - 43
  - 44
  - 45
  - 46
  - 47
  - 48
  - 49
  - 50
  - 51
  - 52
  - 53
  - 54
  - 55
  - 56
  - 57
  - 58
  - 59
  - 60
35. Franzosi R. Content Analysis. *Encycl. Soc. Sci. Res. Methods*. Thousand Oaks, CA: SAGE; 2003. p. 187–91.
36. Pope C, Ziebland S, Mays N. Analysing qualitative data. *Br. Med. J.* 2000;320(January):5–7.
37. Mays N, Pope C. Assessing quality in qualitative research. *Br. Med. J.* 2000;320(January).
38. Lincoln YS, Guba EG. *Naturalistic Inquiry*. Beverly Hills: SAGE Publications; 1985.
39. Janz NK, Champion VL, Strecher VJ. The Health Belief Model. In: Glanz K, Rimer BK, Lewis FM, editors. *Heal. Behav. Heal. Educ. Theory, Res. Pract.* 3rd ed. San Francisco: Jossey-Bass; 2002. p. 45–66.
40. Mutyaba T, Mmiro F a, Weiderpass E. Knowledge, attitudes and practices on cervical cancer screening among the medical workers of Mulago Hospital, Uganda. *BMC Med. Educ.* 2006 Jan [cited 2011 May 27];6:13.
41. White HL, Mulambia C, Sinkala M, Mwanahamuntu MH, Parham GP, Moneyham L, et al. “Worse than HIV” or “not as serious as other diseases”? Conceptualization of cervical cancer among newly screened women in Zambia. *Soc. Sci. Med.* Elsevier Ltd; 2012 May;74(10):1486–93.
42. Edelmann RJ. Embarrassment: The state of research. *Curr. Psychol. Rev.* [Internet]. 1981 May;1(2):125–37.
43. Consedine NS, Krivoshekova YS, Harris CR. Bodily embarrassment and judgment concern as separable factors in the measurement of medical embarrassment: psychometric development and links to treatment-seeking outcomes. *Br. J. Health Psychol.* 2007 Sep;12(Pt 3):439–62
44. Geibel S, King’ola N, Temmerman M, Luchters S. The impact of peer outreach on HIV knowledge and prevention behaviours of male sex workers in Mombasa, Kenya. *Sex. Transm. Infect.* 2012;88(5):357–62.
